# Supplementary material for: Oral administration of bovine milk-derived extracellular vesicles induces senescence in the primary tumor but accelerates cancer metastasis
Source: PubMed Central journal article supplement (PMC8225634; doi:10.1038/s41467-021-24273-8), 2021-06-24

## Supplementary information

### Oral administration of bovine milk-derived extracellular vesicles induces senescence in the primary tumor but accelerates cancer metastasis

Monisha Samuel<sup>1</sup>, Pamali Fonseka<sup>2</sup>, Rahul Sanwani<sup>2</sup>, Lahiru Gangoda<sup>2</sup>, Sing Ho Chee<sup>2</sup>, Shivakumar Keerthikumar<sup>2,3,4</sup>, Alex Spurling<sup>2</sup>, Sai V. Chitti<sup>2</sup>, Damien Zanker<sup>2</sup>, Ching-Seng Ang<sup>5</sup>, Ishara Atukorala<sup>2</sup>, Taeyoung Kang<sup>2</sup>, Sanjay Shahi<sup>2</sup>, Akbar L Marzan<sup>2</sup>, Christina Nedeva<sup>2</sup>, Claire Vennin<sup>6</sup>, Morghan C. Lucas<sup>6</sup>, Lesley Cheng<sup>2</sup>, David Herrmann<sup>6</sup>, Mohashin Pathan<sup>2</sup>, David Chisanga<sup>2</sup>, Sean C. Warren<sup>6</sup>, Kening Zhao<sup>2</sup>, Nidhi Abraham<sup>2</sup>, Sushma Anand<sup>2</sup>, Stephanie Boukouris<sup>2</sup>, Christopher G. Adda<sup>2</sup>, Lanzhou Jiang<sup>2</sup>, Tanmay M. Shekhar<sup>2</sup>, Nikola Baschuk<sup>2</sup>, Christine J. Hawkins<sup>2</sup>, Amelia J. Johnston<sup>2</sup>, Jacqueline Monique Orian<sup>2</sup>, Nicholas J. Hoogenraad<sup>2</sup>, Ivan K. Poon<sup>2</sup>, Andrew F. Hill<sup>2</sup>, Markandeya Jois<sup>1</sup>, Paul Timpson<sup>6</sup>, Belinda S. Parker<sup>2</sup> and Suresh Mathivanan<sup>2,#</sup>

<sup>1</sup>Department of Physiology, Anatomy and Microbiology, School of Life Sciences, La Trobe University, Bundoora, Victoria, 3086, Australia.

<sup>2</sup>Department of Biochemistry and Genetics, La Trobe Institute for Molecular Science, La Trobe University, Melbourne, Victoria, 3086, Australia.

<sup>3</sup>Cancer Research Division, Peter MacCallum Cancer Centre, Melbourne, VIC 3000, Australia.

<sup>4</sup>Sir Peter MacCallum Department of Oncology, University of Melbourne, VIC 3010, Australia.

<sup>5</sup>Bio21 Institute, University of Melbourne, Victoria, 3010, Australia.

<sup>6</sup>Garvan Institute of Medical Research, The Kinghorn Cancer Centre & St Vincent's Clinical School, Faculty of Medicine, University of New South Wales, Sydney, New South Wales, 2010, Australia.

#### **#To whom correspondence should be addressed:**

Professor Suresh Mathivanan

Department of Biochemistry and Genetics,

La Trobe Institute for Molecular Science,

La Trobe University,

Bundoora, Victoria 3086, Australia

Tel: +61 03 9479 2565

Email: [S.Mathivanan@latrobe.edu.au](mailto:S.Mathivanan@latrobe.edu.au)

## Materials

| REAGENT or RESOURCE                 | SOURCE                       | IDENTIFIER     |
|-------------------------------------|------------------------------|----------------|
| <b>Primary Antibodies (Western)</b> |                              |                |
| TSG101                              | BD Transduction Laboratories | #612696        |
| p16                                 | Cell Signaling Technologies® | #2407S, #80772 |
| Vimentin                            | Cell Signaling Technologies® | #5741S         |
| GAPDH                               | Cell Signaling Technologies® | #5174S         |
| Twist                               | Abcam                        | #ab50857       |
| Snail                               | Cell Signaling Technologies® | #3879S         |
| GSK3-β                              | Gene Tex                     | #GTX111192     |
| P-MAPK                              | Cell Signaling Technologies® | #9101S         |
| MAPK                                | Cell Signaling Technologies® | #9102S         |
| P-Stat3                             | Cell Signaling Technologies® | #9134S         |
| Stat3                               | Cell Signaling Technologies® | #4904S         |
| p62                                 | Cell Signaling Technologies® | #2524S         |
| p53                                 | Cell Signaling Technologies® | #5114S         |
| CD63                                | BIO-RAD                      | #MCA2042GA     |
| Ki67                                | Abcam                        | #ab15580       |
| CD8a-PE-Cy7 (53-6.7)                | BD Biosciences               | #552877        |
| CD4-APC-Cy7 (GK1.5)                 | BD Biosciences               | #552051        |
| CD69-APC (H1.2F3)                   | BD Biosciences               | #560689        |
| CD279-PE (J43)                      | BD Biosciences               | #551892        |
| Ly6G-BV421 (1A8)                    | BD Biosciences               | #551461        |
| Ly6C-APC (HK1.4)                    | Biolegend                    | #128016        |
| β-actin                             | Cell Signaling Technologies® | #4970          |
| Caesin                              | Abcam                        | #ab166596      |
| ATG5                                | Cell Signaling Technologies® | #12994S        |
| MMP2                                | Cell Signaling Technologies® | #13132S        |

**Secondary Antibodies  
(Western)**

|                                 |         |           |
|---------------------------------|---------|-----------|
| Anti-mouse IgG-IRDye®<br>800CW  | LI-COR® | 926-32210 |
| Anti-rabbit IgG-IRDye®<br>680RD | LI-COR® | 926-68071 |

**Primary Antibodies  
(Immunohistochemistry)**

|                  |               |           |
|------------------|---------------|-----------|
| Eosin Y solution | Sigma Aldrich | #HT110332 |
| Ki67             | Abcam         | #ab15580  |
| Vimentin         | Sigma Aldrich | #V6630    |

**Biological Samples**

|                 |                                |     |
|-----------------|--------------------------------|-----|
| Raw milk        | Australia DEPI Ellinbank       | N/A |
| Commercial milk | Australian local grocery store | N/A |

**Chemicals, Peptides  
and Recombinant  
Proteins**

|                                      |                          |           |
|--------------------------------------|--------------------------|-----------|
| OptiPrep™ Density<br>Gradient medium | Sigma Life Science®      | #D1556    |
| Sucrose                              | Sigma Life Science®      | #S0389    |
| Tris                                 | Astral                   | #BIO3094T |
| Sypro® Ruby                          | Thermo Fisher Scientific | #S12000   |
| EGTA                                 | Bio Basic                | #ED0077   |
| CaCl <sub>2</sub>                    | Sigma Aldrich            | #449709   |
| DTT                                  | Bio-Rad                  | #1610611  |
| Iodoacetamide                        | Ameresco                 | #M216     |
| Propidium Iodide                     | Sigma Life Science®      | #P4170    |
| Trifluoroacetic acid                 | Thermo Fisher Scientific | #28904    |
| Acetonitrile                         | Honeywell                | #34967    |
| TRIzol-LS                            | Life Technologies        | #10296028 |
| Proteinase-K                         | Merck                    | #124568   |
| DiR                                  | PerkinElmer              | #125964   |
| BSA                                  | Sigma Aldrich            | #A4612    |

|                                     |                              |             |
|-------------------------------------|------------------------------|-------------|
| Sodium citrate                      | Calbiochem®                  | #567446     |
| Collagenase I                       | Sigma Life Science®          | #C0130      |
| D-luciferin                         | Gold Biotechnology           | #LUCK-100   |
| DNAse I                             | Sigma Life Science®          | #AMPD1      |
| Sequence Grade Modified Trypsin     | Promega                      | #V511A      |
| Crystal violet                      | Sigma Aldrich                | #C6158      |
| murine TNF- $\alpha$                | Peprotech                    | #315-01A    |
| SM-164                              | ApexBio                      | #A8815      |
| Necrostatin-1                       | Sigma Aldrich                | #N9037-10MG |
| QVD                                 | R&D Systems                  | #OPH001-01M |
| Bafilomycin A1                      | Sigma Aldrich                | #B1793      |
| <b>Commercial Assays</b>            |                              |             |
| miRNeasy kit                        | Qiagen                       | #217004     |
| Ion Total RNA-Seq kit v2            | Life Technologies            | #4475936    |
| Magnetic Bead Purification Module   | Life Technologies            | #4475486    |
| Ion PGM™ 200 Sequencing Kit v2      | Life Technologies            | #4482006    |
| Ion PGM™ Template OT2 200 kit       | Life Technologies            | #4480974    |
| High Sensitivity DNA kit            | Agilent Technologies         | #5067-4626  |
| CellTiter-Glo 2.0 kit               | Promega                      | #G9241      |
| $\beta$ -Galactosidase Staining kit | Cell Signaling Technologies® | #9860S      |
| <b>Cell Lines</b>                   |                              |             |
| 4T1.2                               | Gifted by B Parker Lab       | N/A         |
| KPC                                 | Gifted by P Timpson Lab      | N/A         |
| SW620                               | Gifted by J Mariadason Lab   | N/A         |
| LIM1215                             | Gifted by J Mariadason Lab   | N/A         |
| C26                                 | Gifted by N Hoogenraad Lab   | N/A         |
| MCF7                                | ATCC                         | N/A         |
| <b>Organisms/Strains</b>            |                              |             |

|                                |                             |     |
|--------------------------------|-----------------------------|-----|
| Balb/c-fox1nuausb              | Animal Resources Centre, WA | N/A |
| Balb/c                         | Animal Resources Centre, WA | N/A |
| CD2F1                          | Gifted by N Hoogenraad Lab  | N/A |
| <b>Software and Algorithms</b> |                             |     |
| ImageJ                         | Open source                 |     |
| Adobe Illustrator              | Adobe Illustrator           |     |
| FunRich                        | FunRich                     |     |
| Graphpad Prism                 | GraphPad Software           |     |
| FlowJo                         | FlowJo                      |     |

| <b>Primer name</b>      | <b>Sequence (5' – 3')</b>                       | <b>Melting temperature</b> |
|-------------------------|-------------------------------------------------|----------------------------|
| <b>mCherry Forward</b>  | GACCACCTACAAGGCCAAGAAG                          | 57.7                       |
| <b>mCherry Reverse</b>  | AGGTGATGTCCAACCTTGATGTTGA                       | 56.5                       |
| <b>hydrolysis probe</b> | FAM-CAGCTGCCCCGGCGCCTACA-<br>TAMRA              | 65.9                       |
| <b>Vimentin Forward</b> | AGCTGCTAACTACCAGGACACTATT<br>G                  | N/A                        |
| <b>Vimentin Reverse</b> | CGAAGGTGACGAGCCATCTC                            | N/A                        |
| <b>hydrolysis probe</b> | VIC-<br>CCTTCATGTTTTGGATCTCATCCTGC<br>AGG-TAMRA | N/A                        |

## **Supplementary Tables**

### **Supplementary Table 1**

List of proteins identified in bovine milk-derived extracellular vesicles

### **Supplementary Table 2**

List of RNA identified in bovine milk-derived extracellular vesicles

### **Supplementary Table 3**

List of bovine proteotypic tryptic peptides

### **Supplementary Table 4**

List of proteins differentially abundant in liver tissue of control and milk EVs treated mice

### **Supplementary Table 5**

List of proteins identified in breast cancer cells treated with and without milk EVs for 72 h



# Supplementary Figure 1

**a**

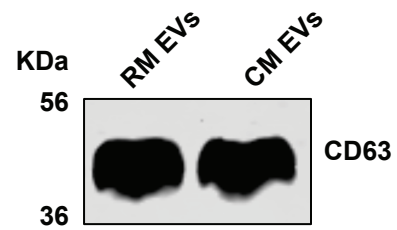

**b**

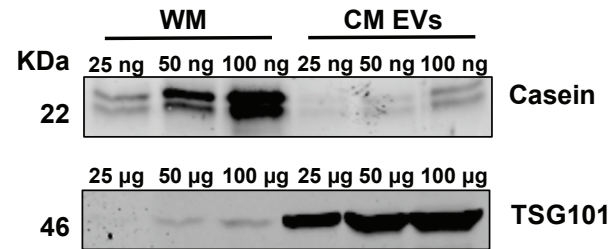

**c**

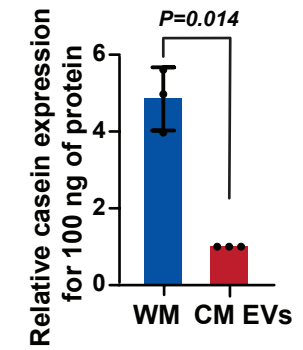

**d**

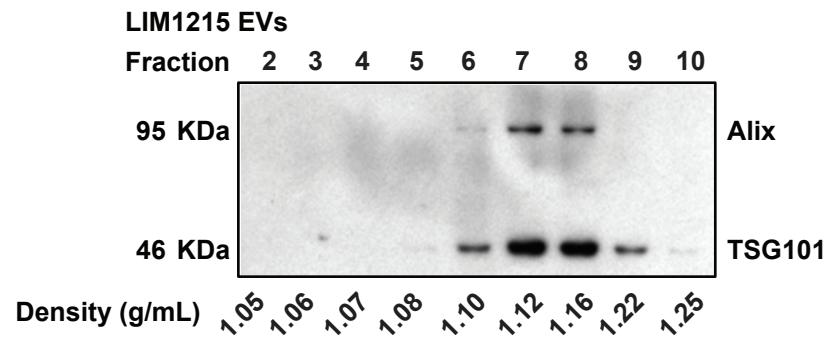

**e**

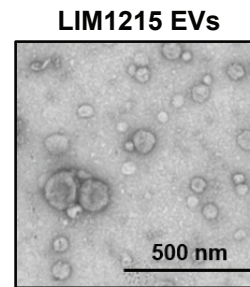

**f**

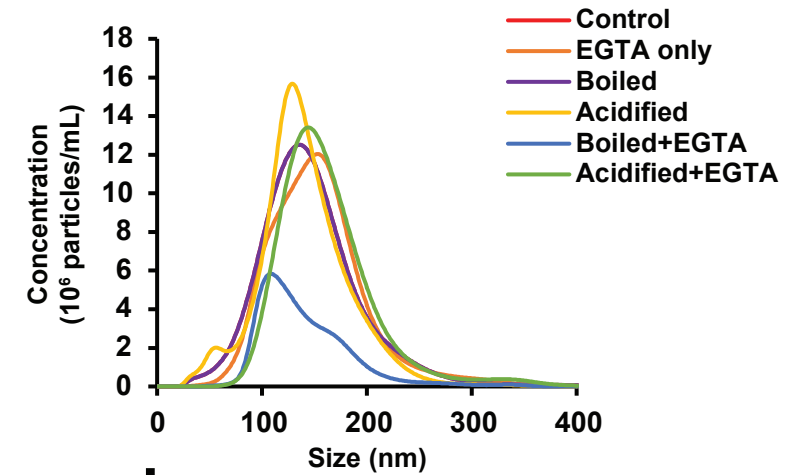

**g**

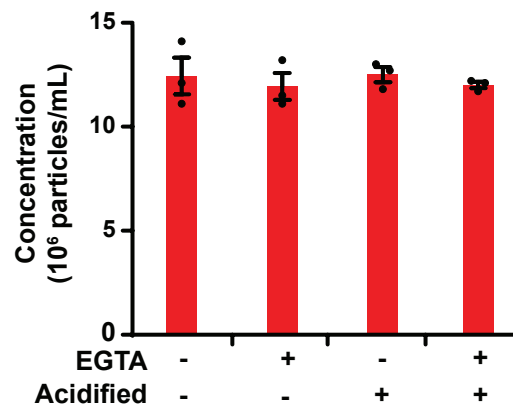

**h**

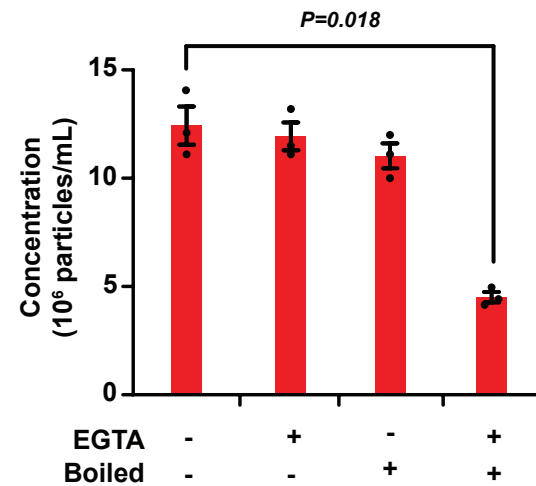

**i**

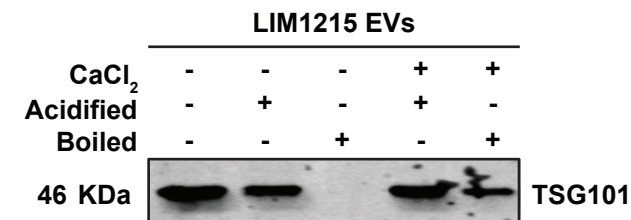

## Supplementary Fig. 1

### Characterization of milk derived EVs

**a**, Western blot analysis of EV enriched protein CD63 in milk-derived EV samples. **b**, Western blot analysis of milk abundant protein casein and EV enriched protein TSG101 in WM and CM EVs. **c**, Relative casein abundance in whole milk and CM EVs. **d**, Western blot analysis of EV enriched proteins Alix and TSG101 in LIM1215 colorectal cancer cell-derived EV samples. **e**, TEM images of LIM1215 colorectal cancer cell-derived EVs. **f, g, h**, Stability of EVs was assessed using Nanoparticle Tracking Analysis by comparing particle size and concentration to untreated milk-derived EVs after pre-treatment of EGTA (calcium chelating agent) and further acidifying and boiling. All data are represented as mean  $\pm$  s.e.m.  $n=3$ ; Statistical significance was determined by unpaired two-tailed t-test. **i**, Calcium chloride was added to LIM1215-derived EVs prior to acidification or boiling and subjected to Western blot analysis for TSG101.

# Supplementary Figure 2

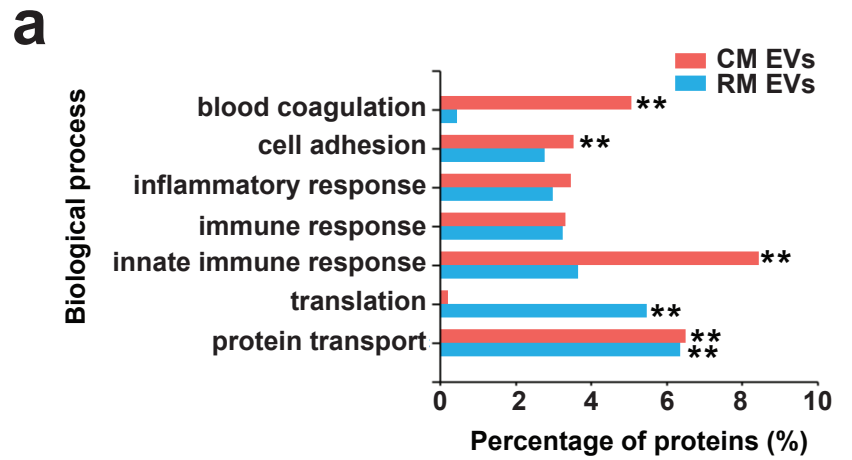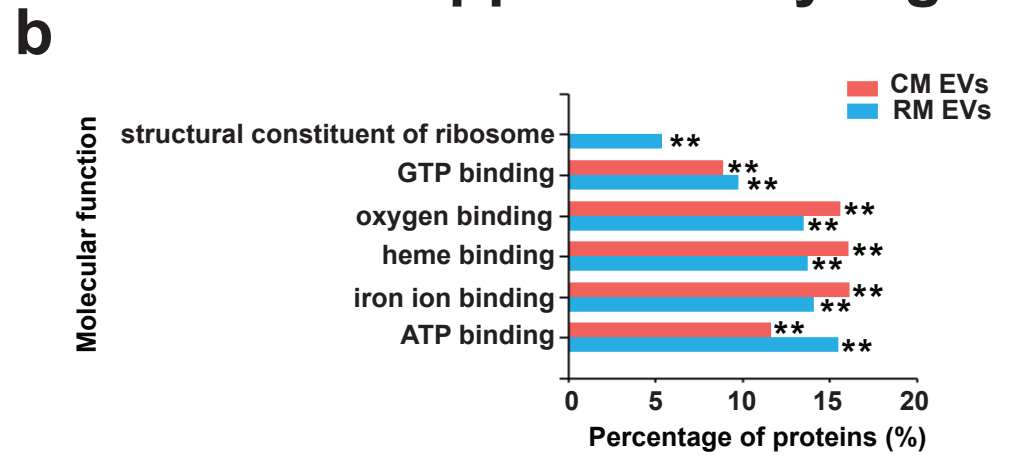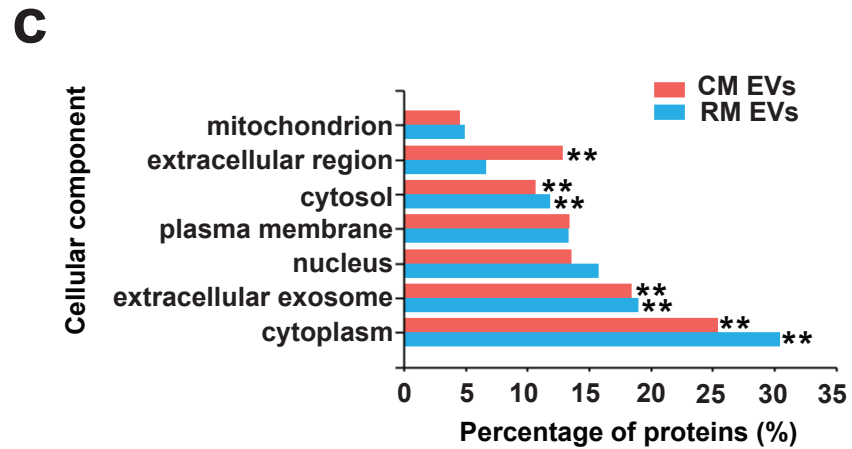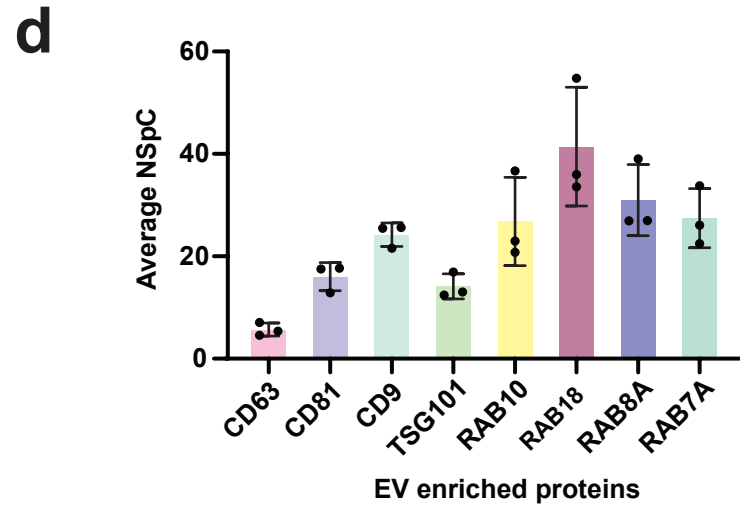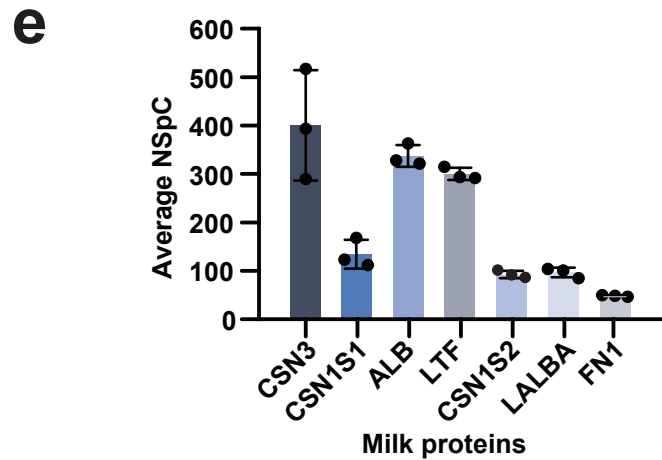

## Supplementary Figure 2

### Enrichment analysis of proteins identified in milk-derived EVs

**a**, Biological processes enriched in proteins that are more than 2-fold abundant in RM and CM EVs are displayed (\*\*P<0.01 as determined by hypergeometric test). **b**, Molecular function-based analysis of proteins that are more than 2-fold enriched in RM and CM EVs (\*\*P<0.01 as determined by hypergeometric test). **c**, Cellular component analysis of proteins that are more than 2-fold abundant in RM and CM derived EVs are displayed (\*\*P<0.01 as determined by hypergeometric test). **d**, Normalised spectral counts of EV enriched proteins in CM EVs ( $n=3$ ). **e**, Normalised spectral counts of milk proteins in CM EVs ( $n=3$ ). All data are represented as mean  $\pm$  s.e.m.

# Supplementary Figure 3

**a**

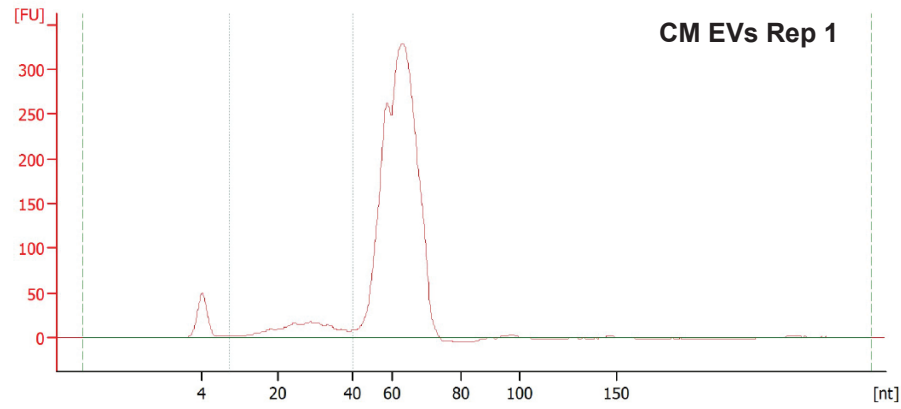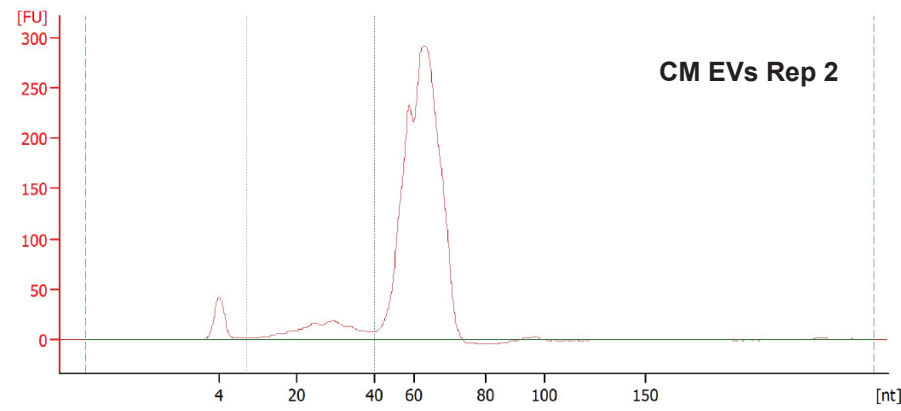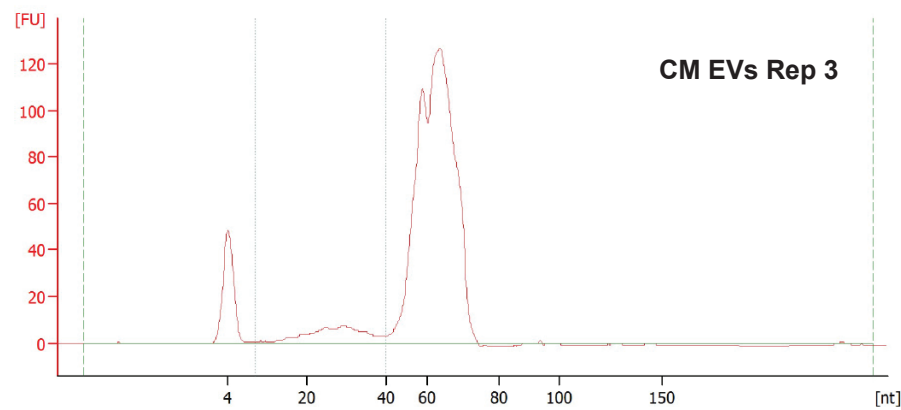

**b**

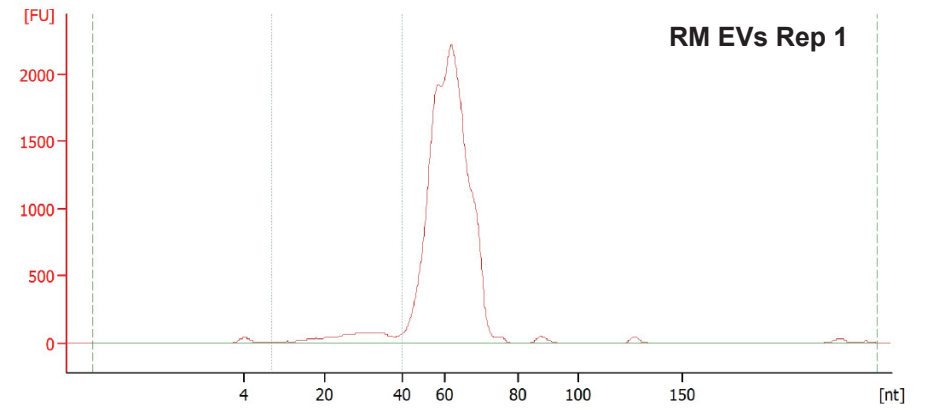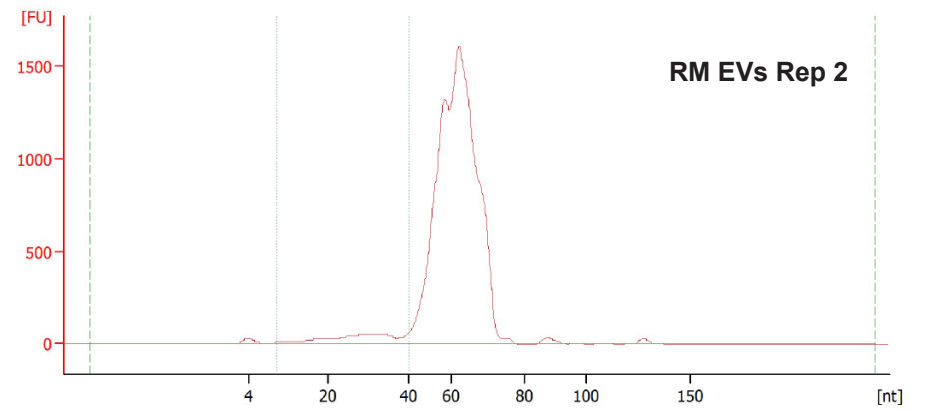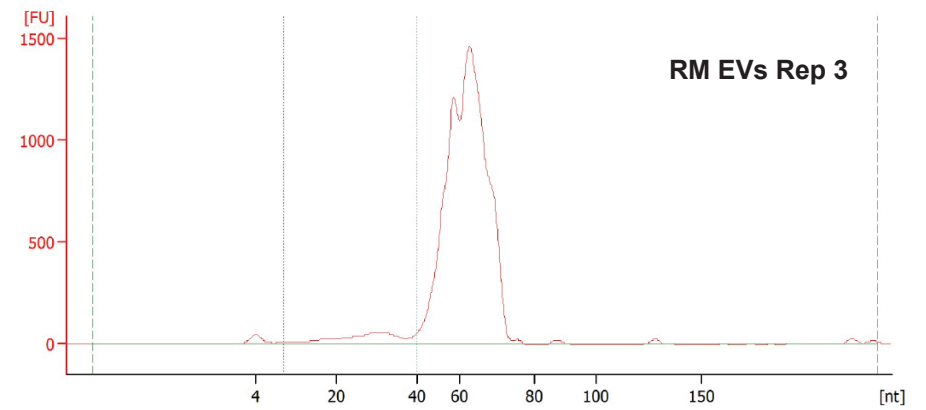

### **Supplementary Figure 3**

#### **Bioanalyzer profile of EVs**

**a**, Bioanalyzer profile of CM EVs – three biological replicates. **b**, Bioanalyzer profile of RM EVs – three biological replicates.

# Supplementary Figure 4

**a**

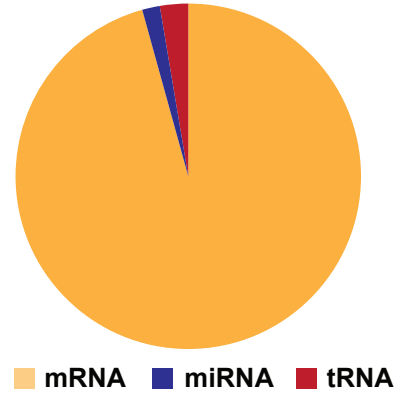

**b**

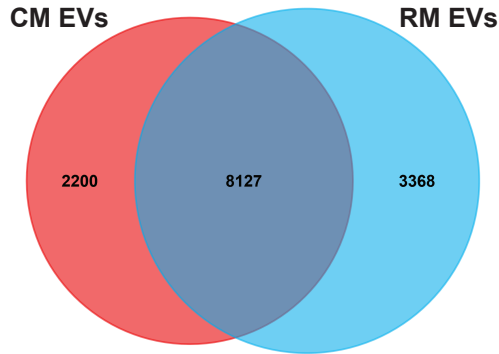

**c**

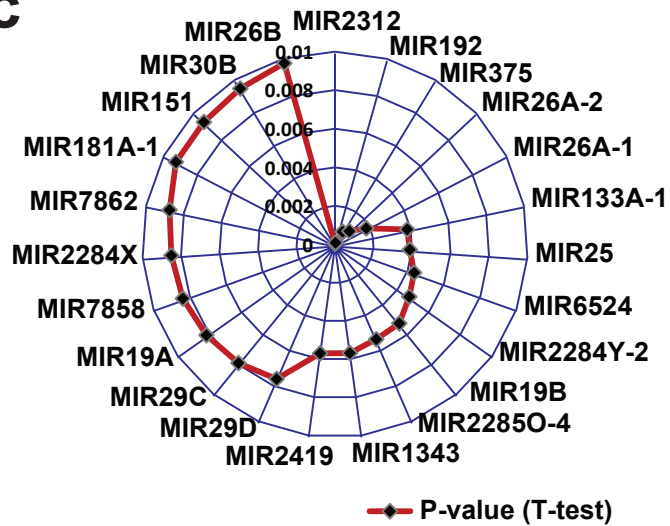

**d**

Biological pathway

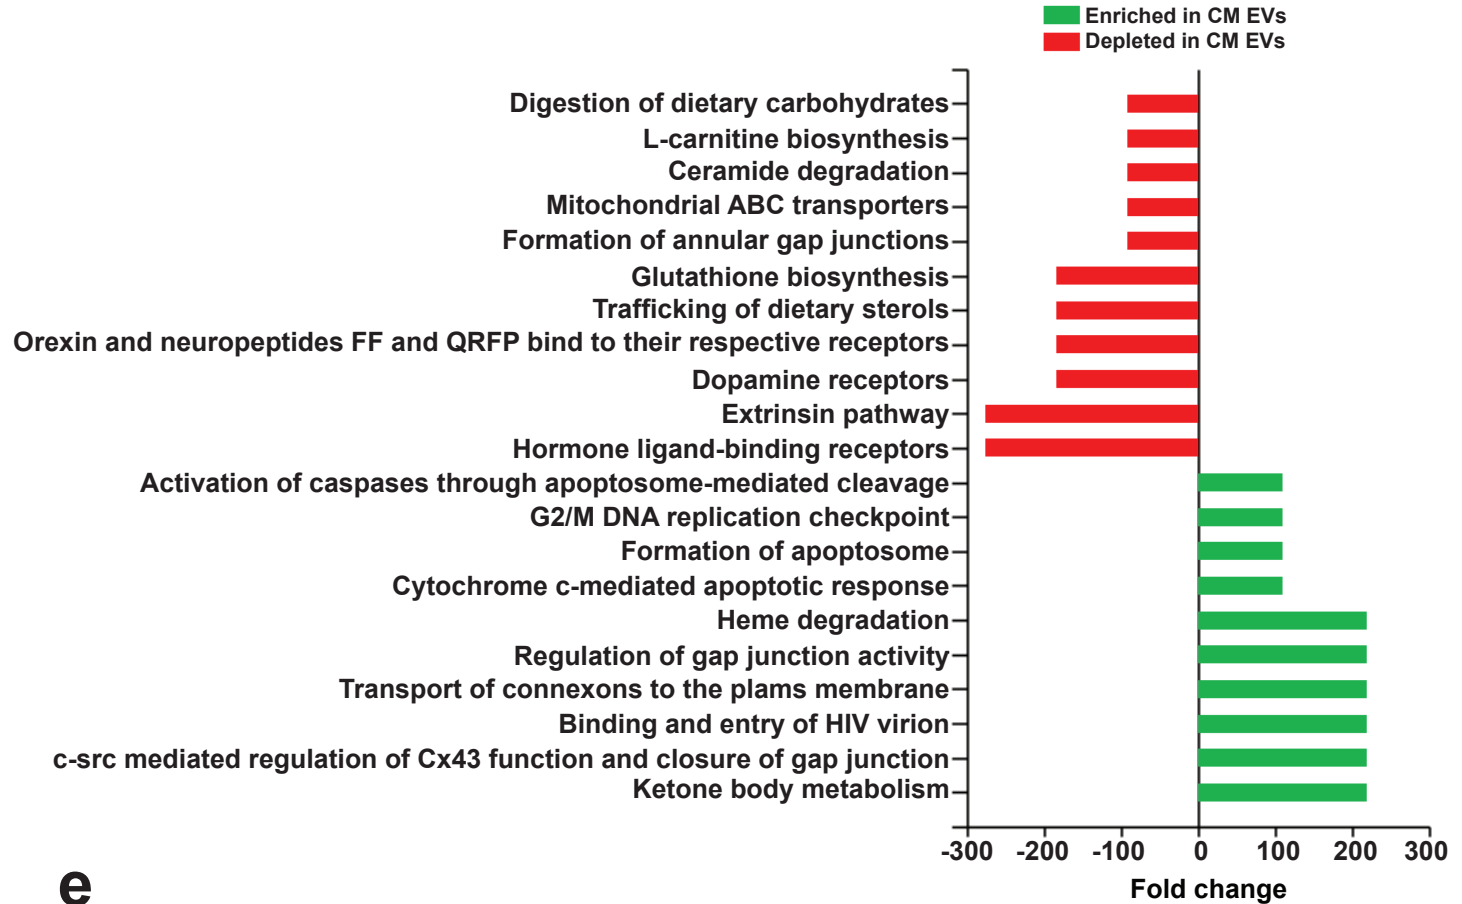

**e**

Biological process

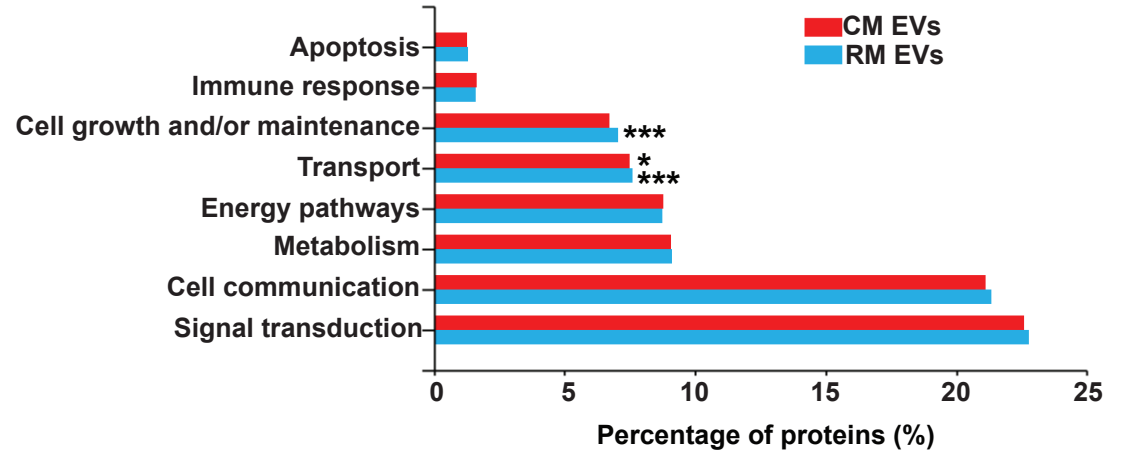

## Supplementary Figure 4

### Transcriptomic profile of milk-derived EVs

**a**, Pie chart of RNA distribution in milk-derived EVs. **b**, Venn diagram of RNA identified in all three replicates of CM and RM EVs. **c**, Plot representing significant miRNAs detected in RM or CM EVs (P-value determined by unpaired two-tailed t-test). **d**, Enrichment or depletion of RNA implicated in biological pathways in CM EVs compared to RM EVs is depicted. **e**, Biological process-based analysis of RNAs that are more than 2-fold enriched in RM and CM EV (\*P < 0.05, \*\*P < 0.01; \*\*\*P < 0.001 as determined by hypergeometric test).



# Supplementary Figure 5

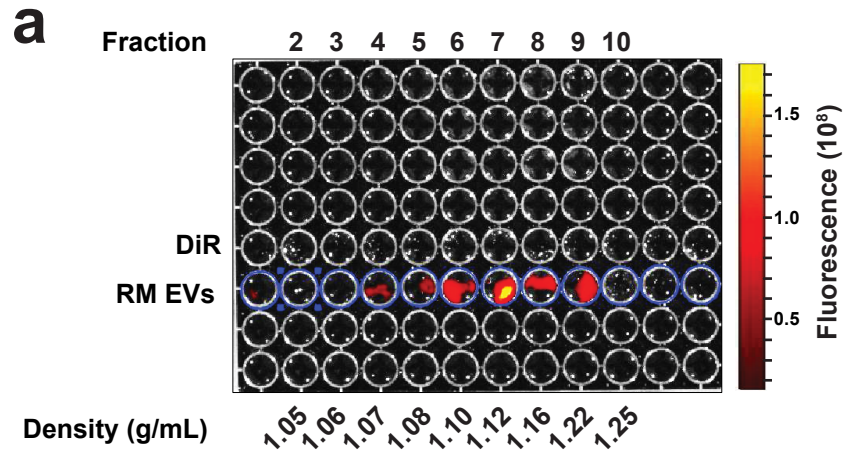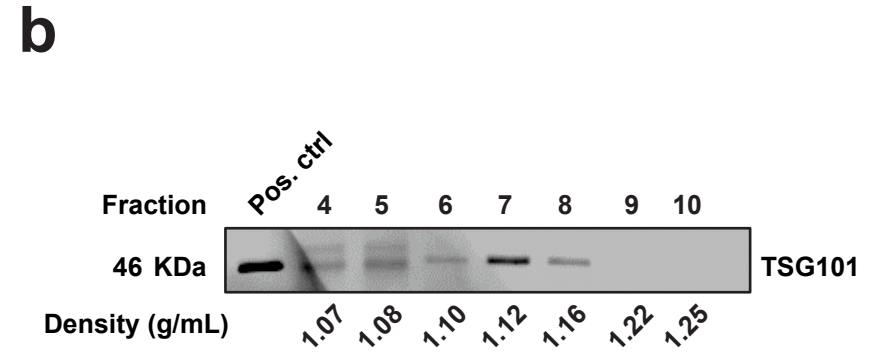

## **Supplementary Figure 5**

### **Biodistribution of milk derived EVs**

**a**, Image depicting fluorescence of 12 fractions of DiR-labelled EVs and free dye in black 96-well plate after OptiPrep density gradient centrifugation. **b**, Western blot analysis of TSG101 in fractions of DiR-labelled milk derived EVs in increasing density obtained from the OptiPrep density gradient centrifugation.

# Supplementary Figure 6

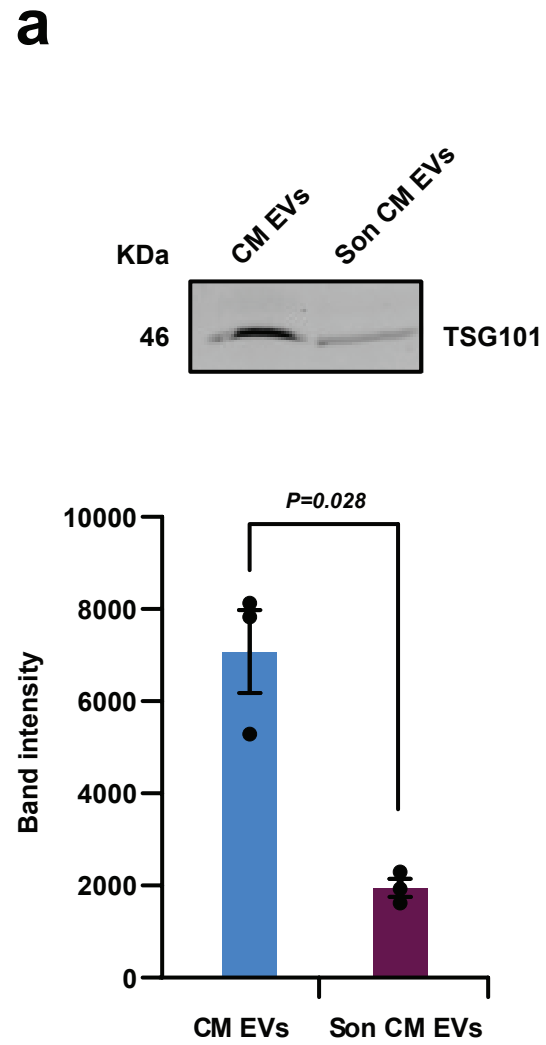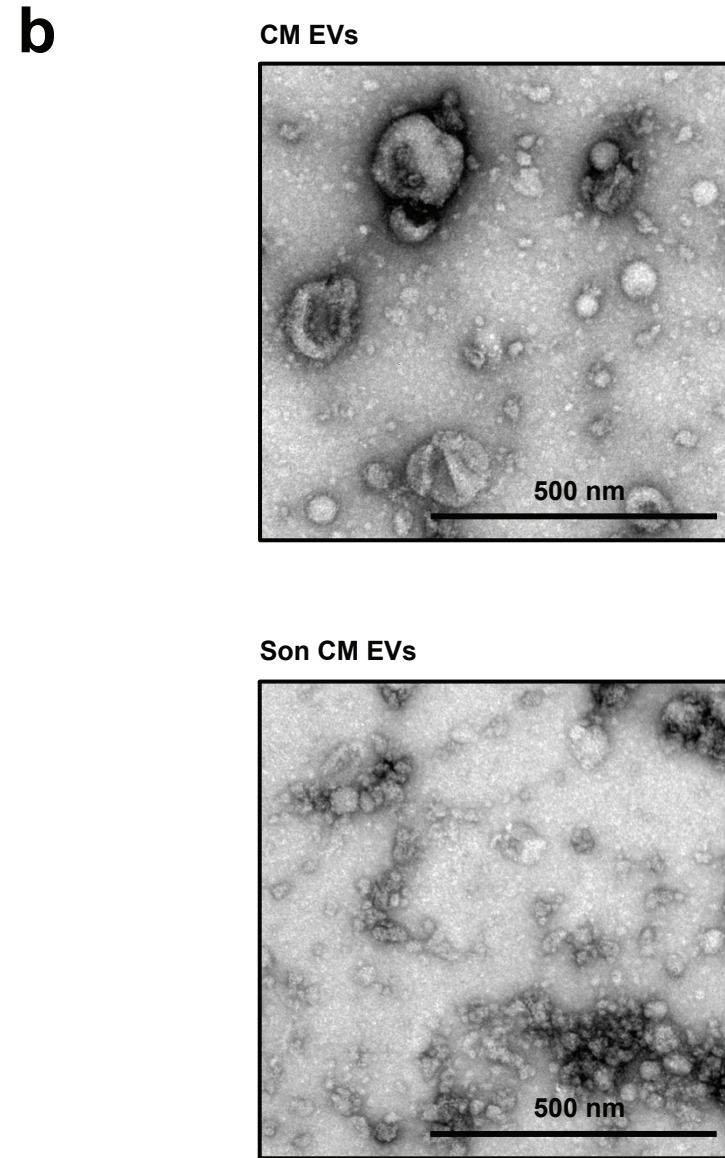

## Supplementary Figure 6

### Sonication of milk-derived EVs reduces the presence of larger vesicles

**a**, Western blot analysis confirms that EV enriched luminal protein TSG101 was significantly decreased on sonication of milk-derived EVs ( $n=3$ ). All data are represented as mean  $\pm$  s.e.m. Statistical significance was determined by unpaired two-tailed t-test. **b**, TEM images of sonicated milk-derived EVs show reduction in larger vesicles as compared to the intact CM EVs.

# Supplementary Figure 7

**a**

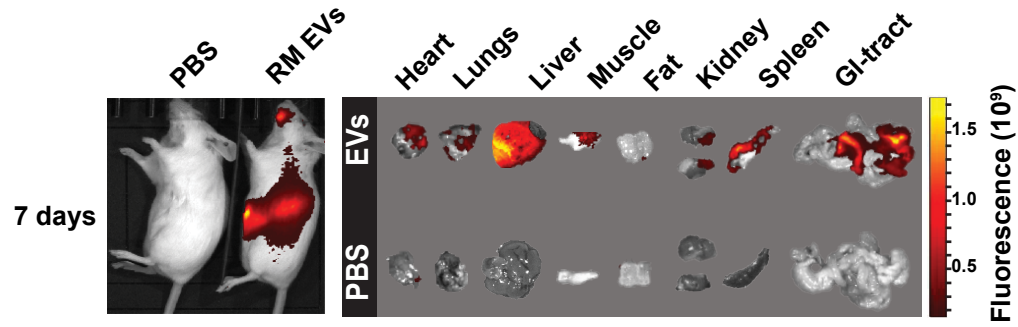

**b**

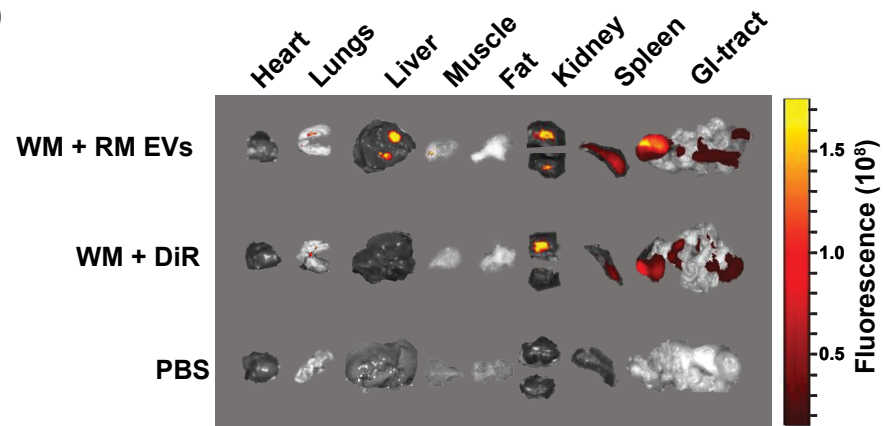

**c**

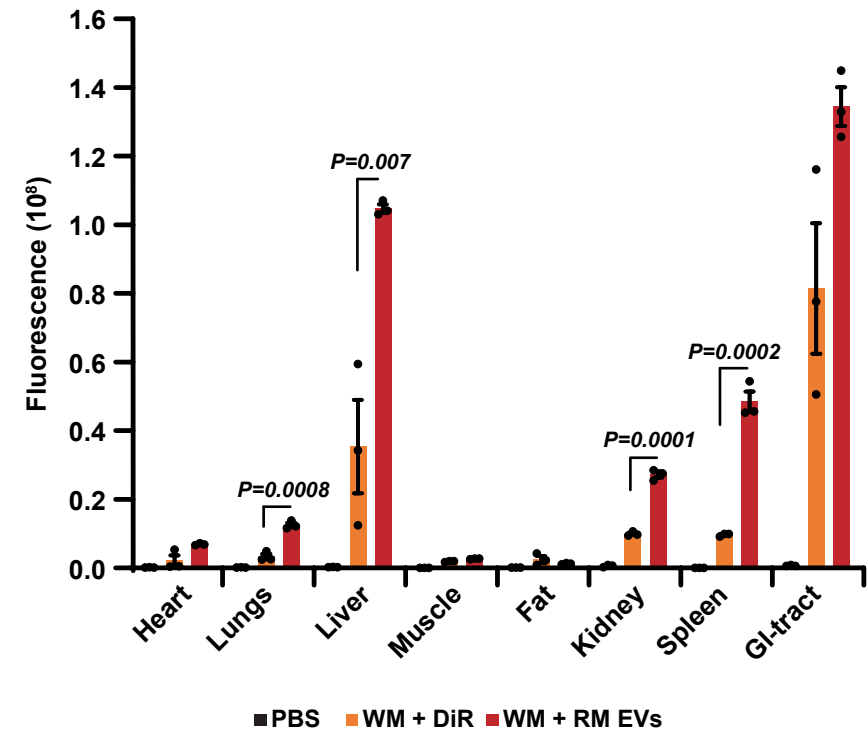

## Supplementary Figure 7

### Biodistribution of milk derived EVs and whole milk

**a**, In vivo imaging of mice after 7 days of daily oral administration (p.o.) of DiR labelled milk-derived EVs (25 mg/kg). **b, c**, Female BALB/c mice were administered a single dose of whole CM (60  $\mu$ L) which was supplemented with 500  $\mu$ g of DiR-labelled EVs and was compared to whole milk with free dye by *in vivo* imaging after oral administration to the mice ( $n=3$ ). All data are represented as mean  $\pm$  s.e.m. Statistical significance was determined by unpaired two-tailed t-test.

# Supplementary Figure 8

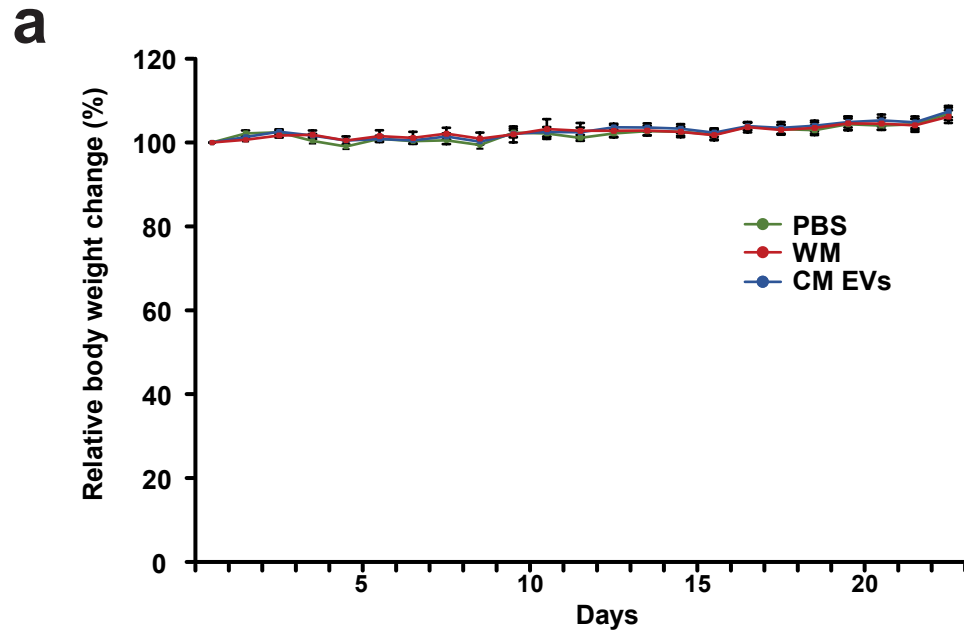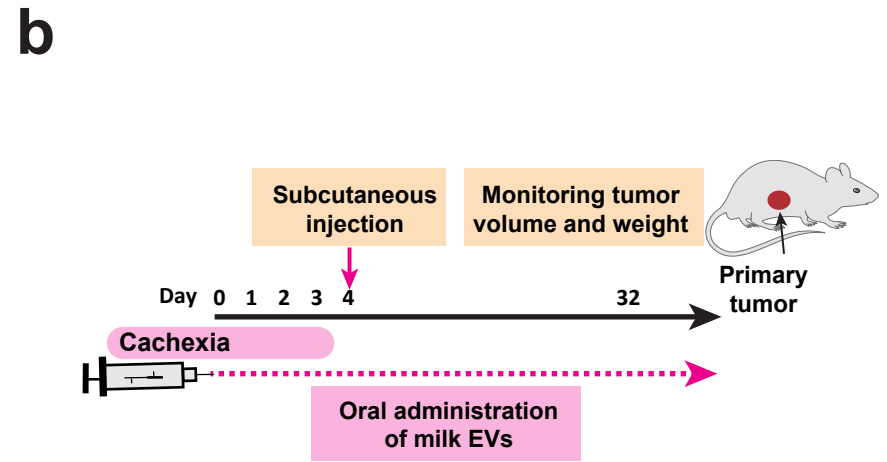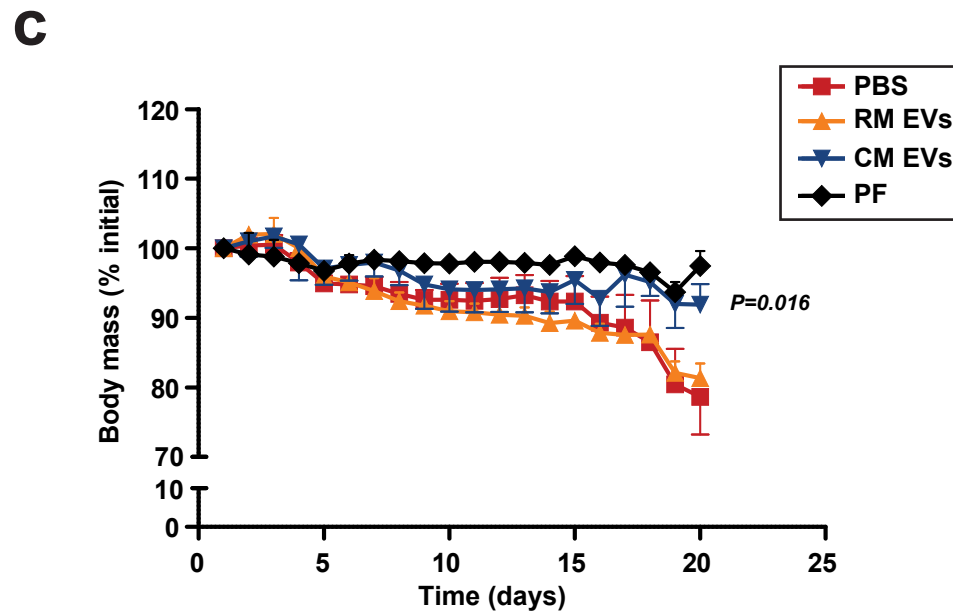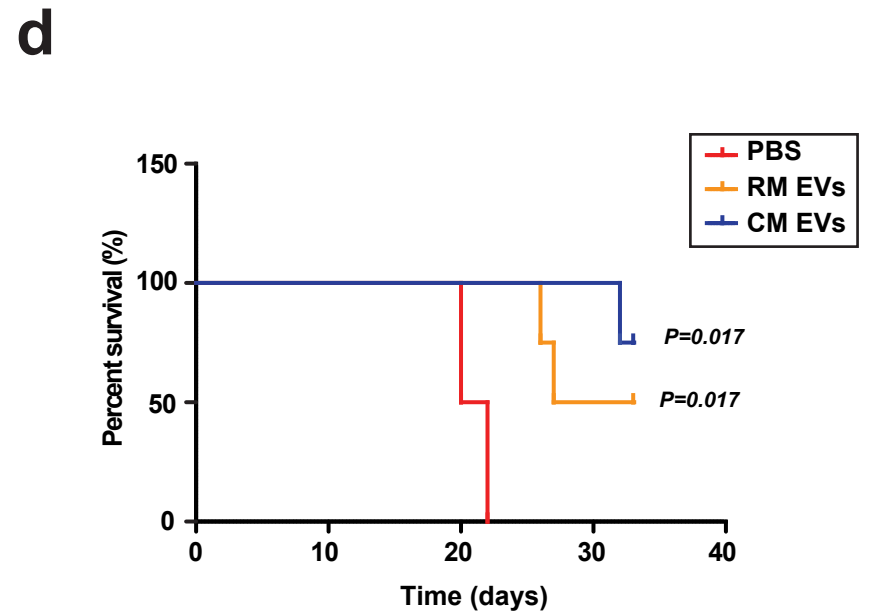

## Supplementary Figure 8

### Milk-derived EVs attenuates cancer induced weight loss

**a**, Relative body weight of mice orally administered with PBS, WM (140  $\mu$ L) and CM EVs (50 mg/kg) ( $n=5$ ). **b**, Schematic representation of cancer cachexia experiment. **c**, Group average mouse weight standardized to starting weight. **d**, Kaplan–Meier curve depicting the survival of immunocompetent C-26 colon cancer mice orally administered with RM and CM EVs (25 mg/kg;  $n=4$ ). PF=pair fed; all data are represented as mean  $\pm$  s.e.m. Statistical significance was determined by unpaired two-tailed t-test.



# Supplementary Figure 9

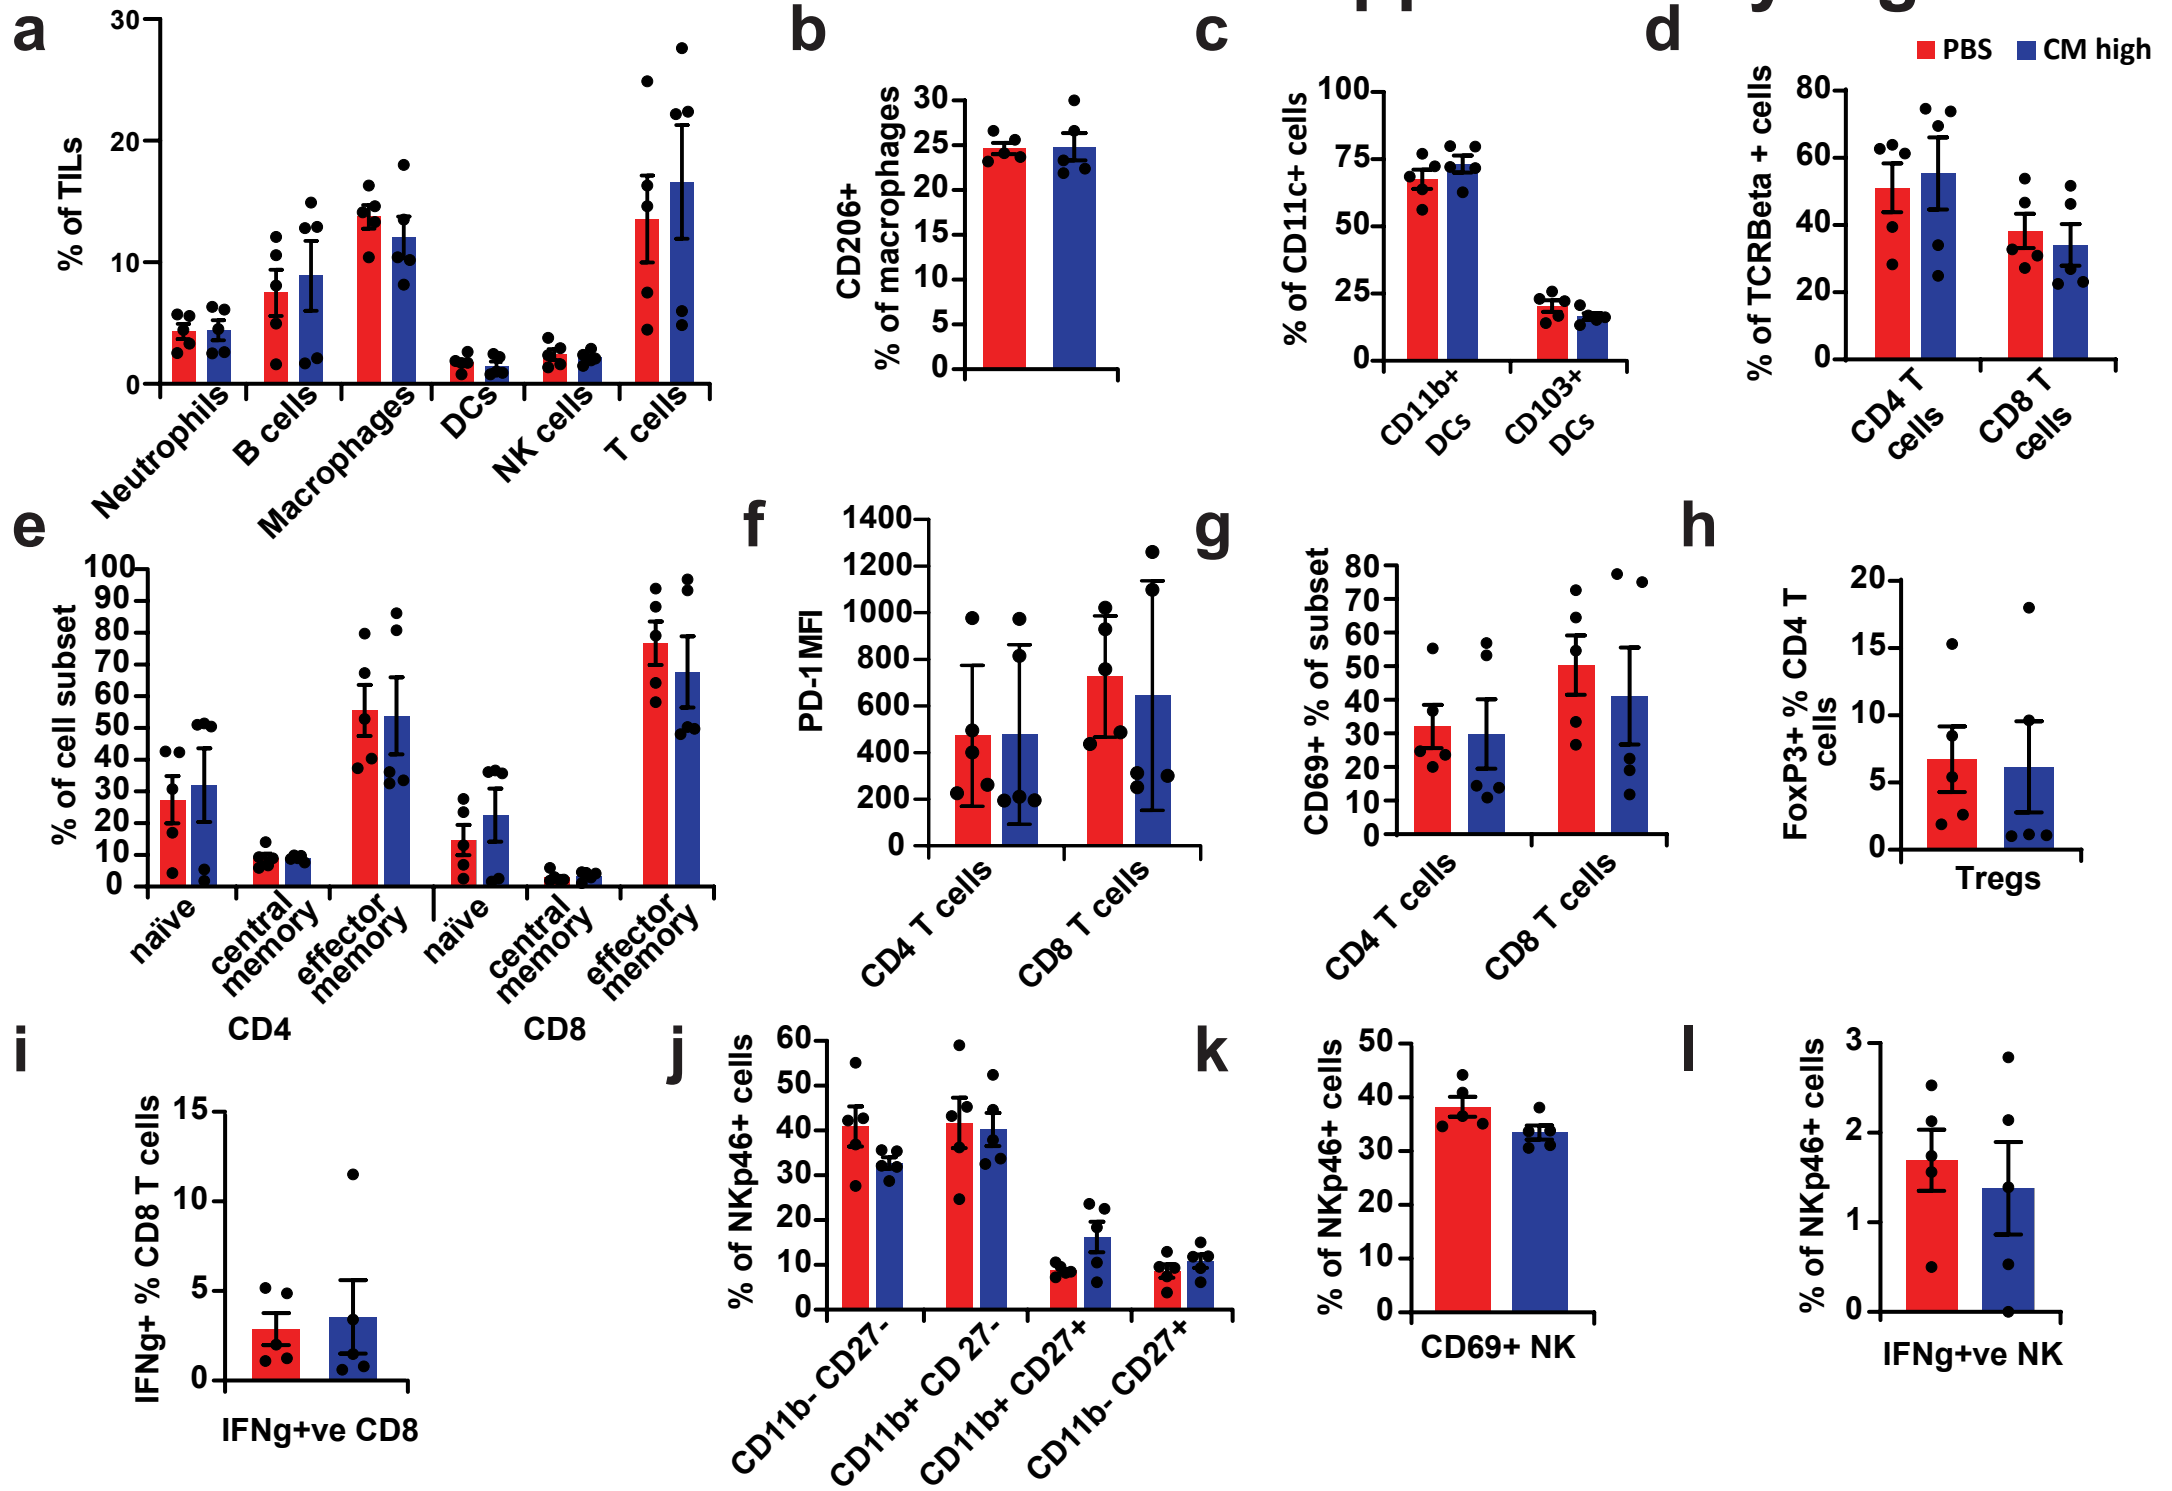

## Supplementary Figure 9

### Milk EVs do not alter the activation or differentiation of tumor-associated innate and adaptive cells

Primary tumors from PBS control or CM high EV-treated mice were digested and various cell subsets were enumerated by flow cytometry: **a**, Neutrophils: Ly6G<sup>hi</sup>, Ly6C<sup>mid</sup>; B cells: CD45R<sup>+</sup>; Macrophages: F4/80<sup>+</sup>; Dendritic cells: CD11c<sup>+</sup>, F4/80<sup>-</sup>; NK cells: NKp46<sup>+</sup>, TCRβ<sup>-</sup>; T cells: TCRβ<sup>+</sup>, NKp46<sup>-</sup>. **b**, Tumor-associated macrophages: F4/80<sup>+</sup>, CD206<sup>+</sup>, MHC Class II<sup>hi</sup>. **c**, CD11c<sup>+</sup> dendritic cells were further segregated into CD11b<sup>+</sup> and CD103<sup>+</sup> subsets. T cells were further segregated into **d**, CD4 and CD8 subsets, **e**, CD44 and CD62L differentiation status, activation status by **f**, PD-1 expression and **g**, CD69 expression. **h**, regulatory CD4 T cell numbers and **i**, proportion of tumor-specific CD8 T cells denoted by production of IFNγ. NK cells were segregated into **j**, CD11b and CD27 differentiation status, **k**, activation status denoted by CD69 expression and **l**, tumor-specificity denoted by IFNγ production upon restimulation with tumor cells (*n*=5). All data are represented as mean ± s.e.m. Statistical significance was determined by unpaired two-tailed t-test.

# Supplementary Figure 10

**a**

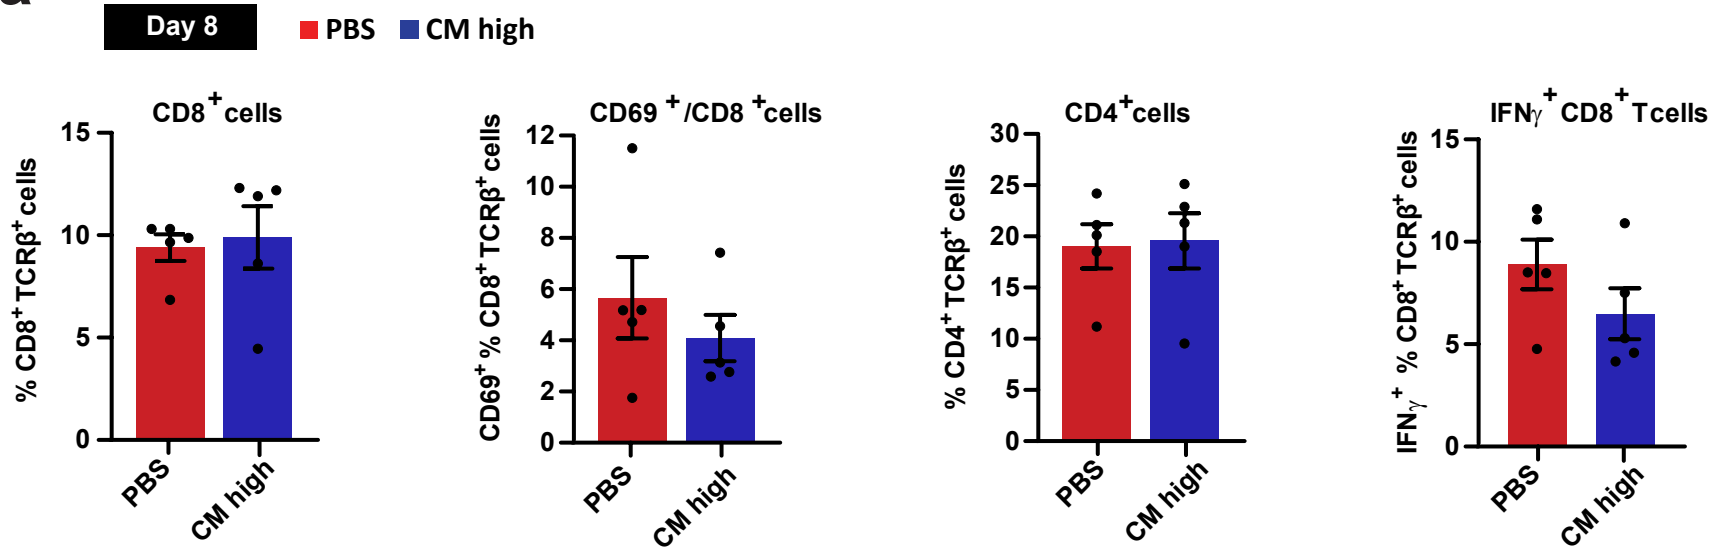

**b**

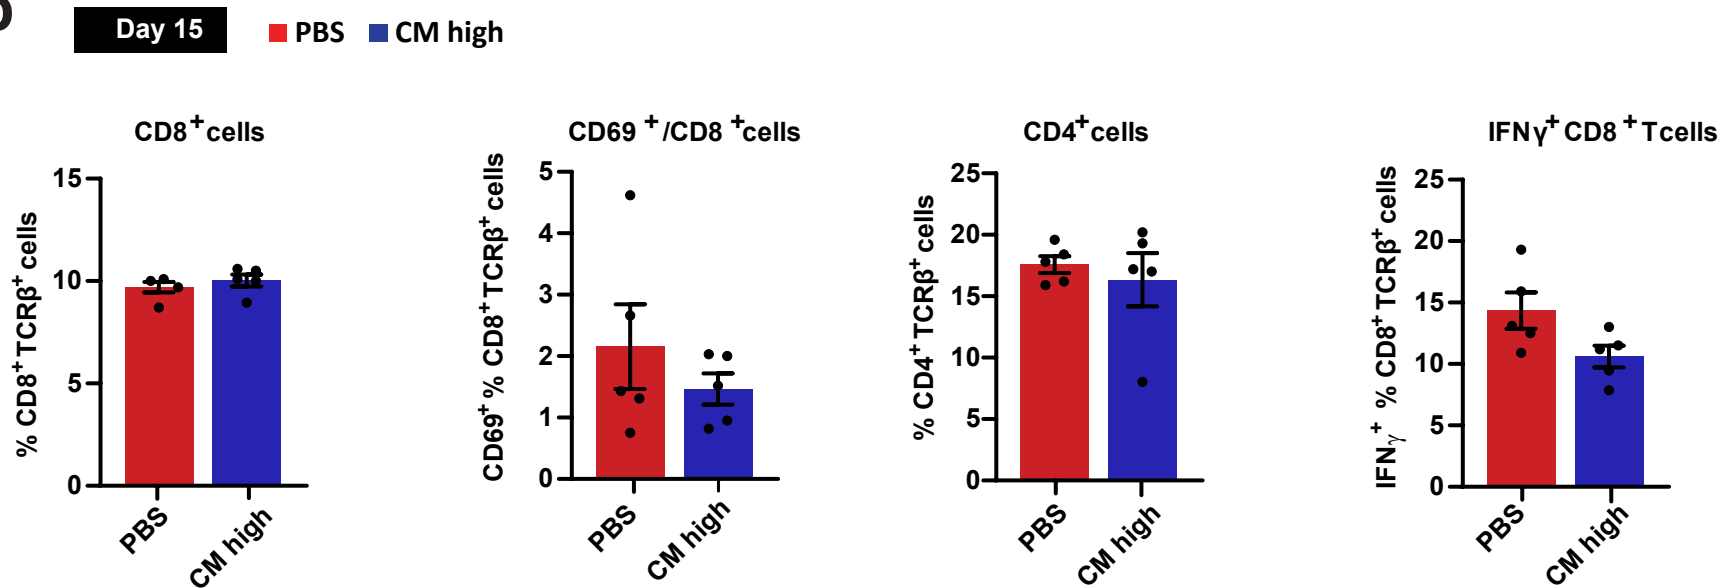

## **Supplementary Figure 10**

### **Flow cytometric analysis of circulating or infiltrating immune cells in the blood of metastatic 4T1.2 breast cancer mouse model**

**a**, Percentage of circulating CD4<sup>+</sup> T-cells, CD69<sup>+</sup>/CD8<sup>+</sup> T-cells, and CD8<sup>+</sup> T-cells at day 8 after treatment with PBS and CM EVs. **b**, Percentage of tumor CD4<sup>+</sup> T-cells, CD69<sup>+</sup>/CD8<sup>+</sup> T-cells and CD8<sup>+</sup> T cells at day 15 after treatment with PBS, and CM EVs ( $n=5$ ). All data are represented as mean  $\pm$  s.e.m. Statistical significance was determined by unpaired two-tailed t-test.

# Supplementary Figure 11

**a** Day 8 NK cells

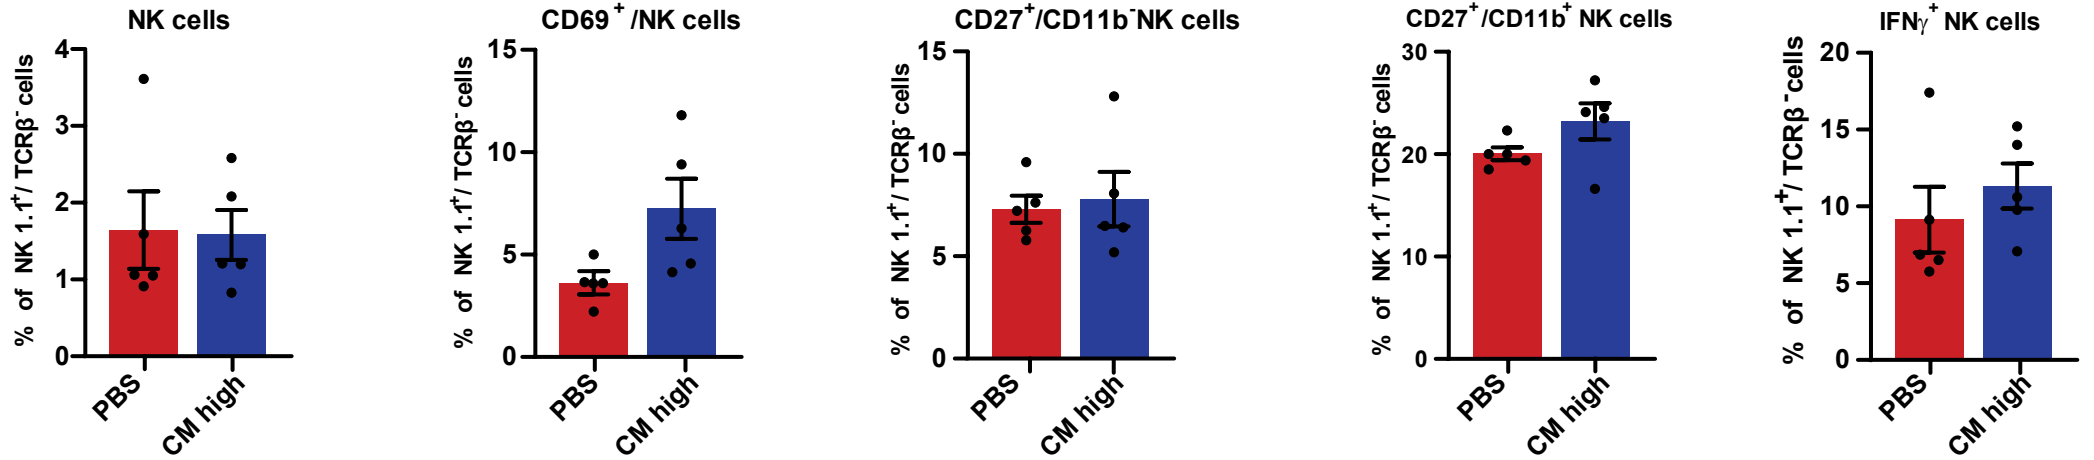

**b** Day 15 NK cells

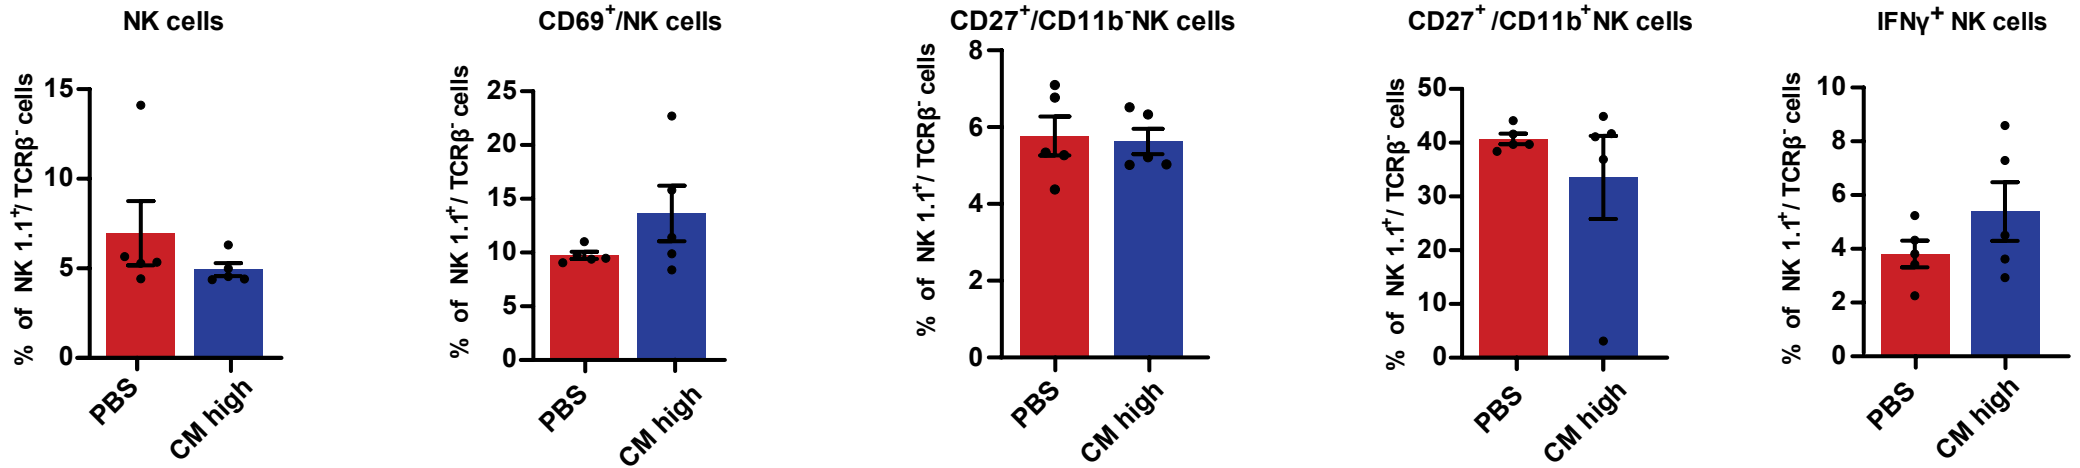

**c** Day 8 Macrophages

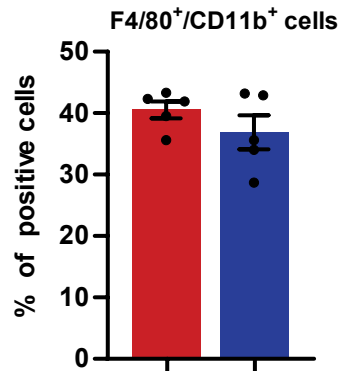

Day 15 Macrophages

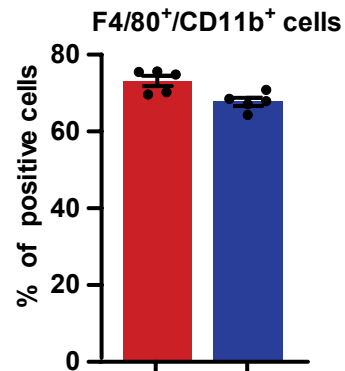

**d** Day 8 MDSCs

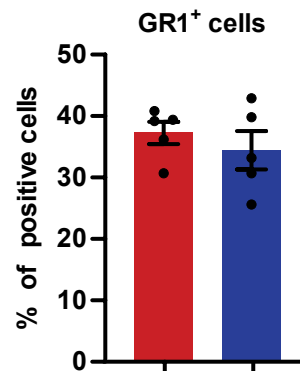

Day 15 MDSCs

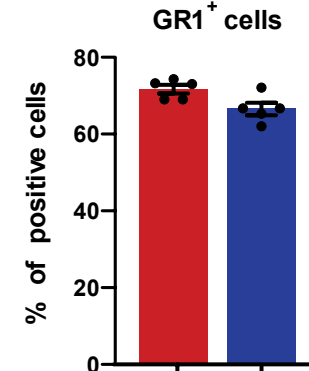

■ PBS ■ CM high

## **Supplementary Figure 11**

### **Flow cytometric analysis of NK cells, macrophages and MDSCs in the blood of metastatic 4T1.2 breast cancer mouse model**

**a**, Percentage of circulating NK cells at day 8 after treatment with PBS and CM EVs.

**b**, Percentage of NK cells at day 15 after treatment with PBS, and CM EVs. **c**,

Percentage of macrophages at day 8 and 15 after treatment with PBS and CM EVs.

**d**, Percentage of MDSCs at day 8 and 15 after treatment with PBS and CM EVs ( $n=5$ ).

All data are represented as mean  $\pm$  s.e.m. Statistical significance was determined by unpaired two-tailed t-test.

# Supplementary Figure 12

**a**

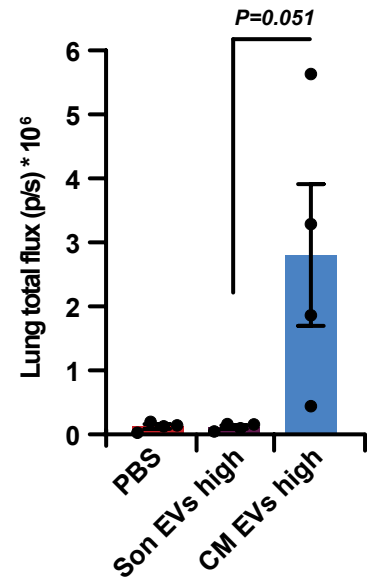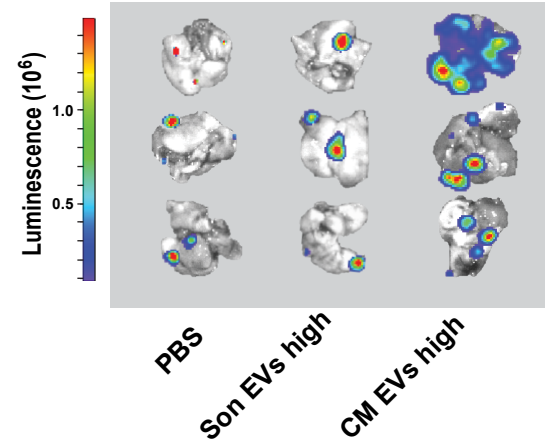

**b**

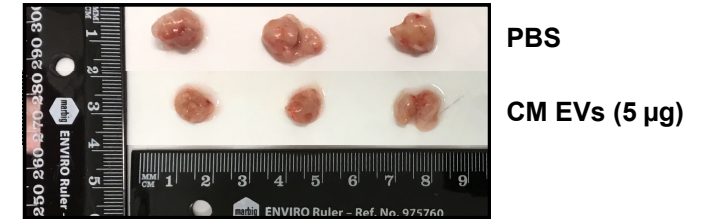

## Supplementary Figure 12

### Low amounts of CM EVs reduce primary tumor

**a**, Quantification of *ex vivo* imaging of lungs from metastatic breast cancer models treated with PBS, sonicated and intact milk-derived CM EVs. Total lung flux to quantify breast cancer metastasis to lungs is depicted ( $n=5$ ). All data are represented as mean  $\pm$  s.e.m. Statistical significance was determined by unpaired two-tailed t-test. **b**, Harvested primary tumor size from mice treated with PBS and CM EVs (5  $\mu$ g) is shown.



# Supplementary Figure 13

**a**

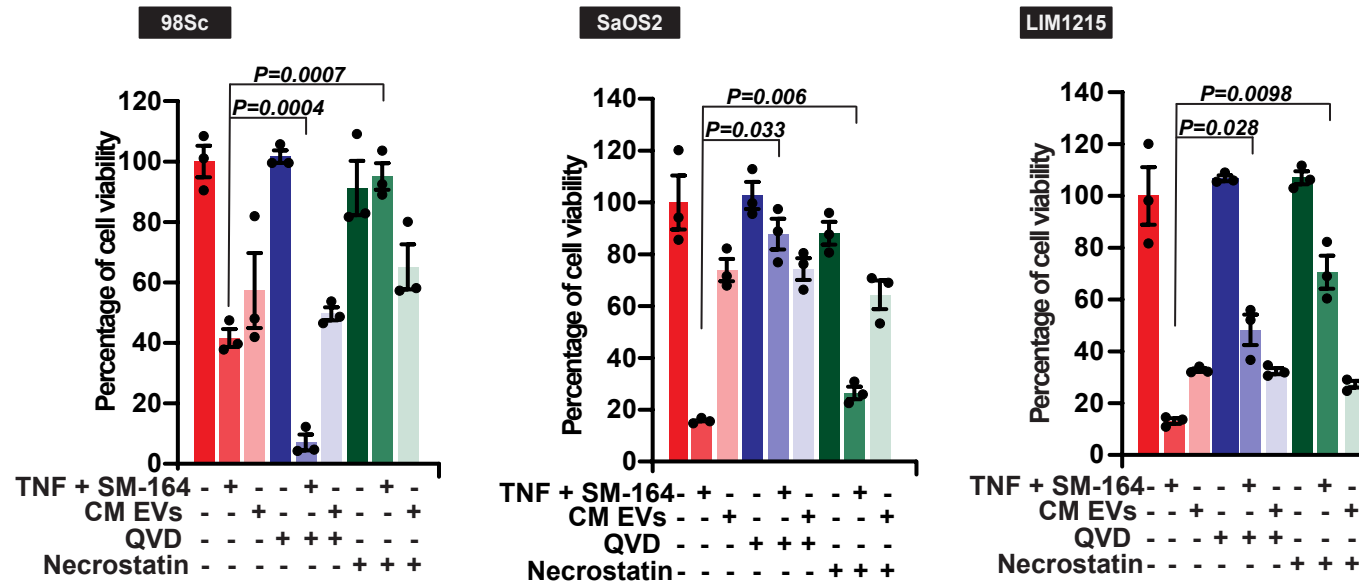

**b**

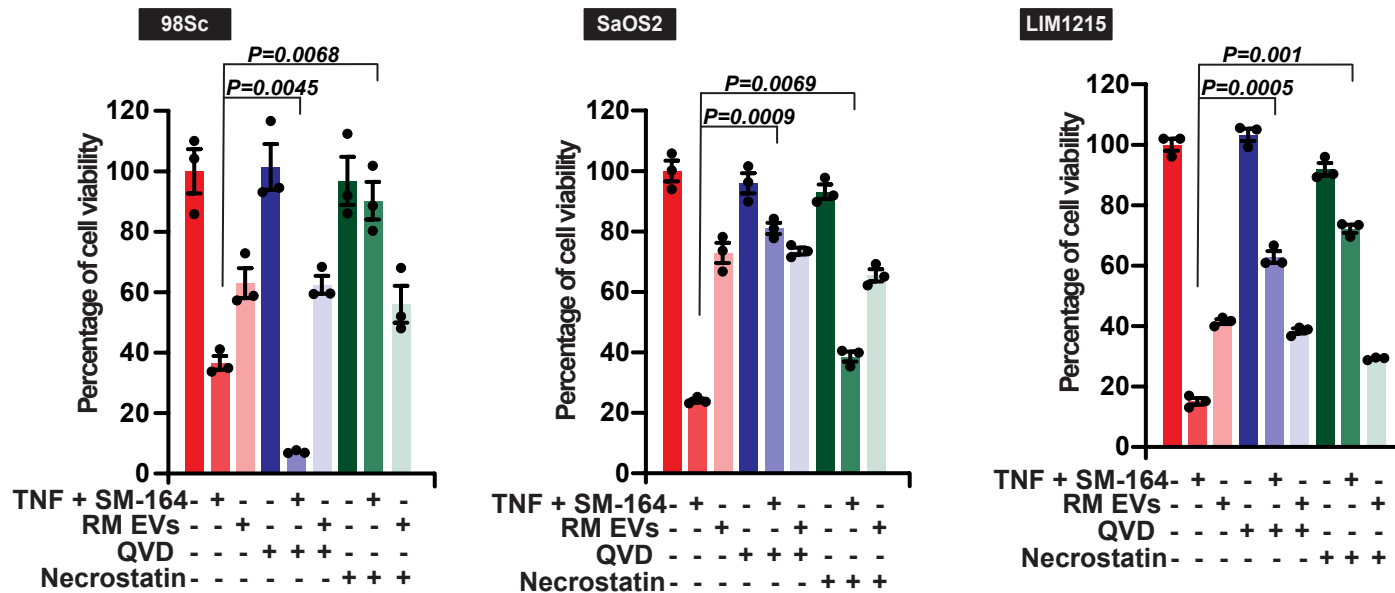

### **Supplementary Figure 13**

**Milk-derived EVs reduces the proliferation of cancer cells independent of caspase-dependent apoptosis and necroptosis.**

**a**, Percentage of cell death in cancer cells treated with or without pan-caspase inhibitor QVD or necroptosis inhibitor after treatment with CM EVs. Two osteosarcoma cells and one colorectal cancer (LIM1215) cells were used in this analysis. **b**, Percentage of cell death in cancer cells treated with or without pan-caspase inhibitor QVD or necroptosis inhibitor after treatment with RM EVs ( $n=3$ ). All data are represented as mean  $\pm$  s.e.m. Statistical significance was determined by two-tailed t-test.

# Supplementary Figure 14

**a**

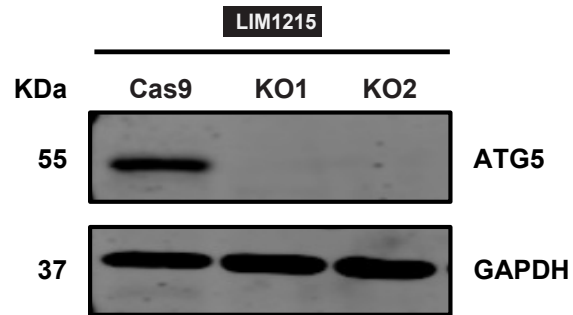

**b**

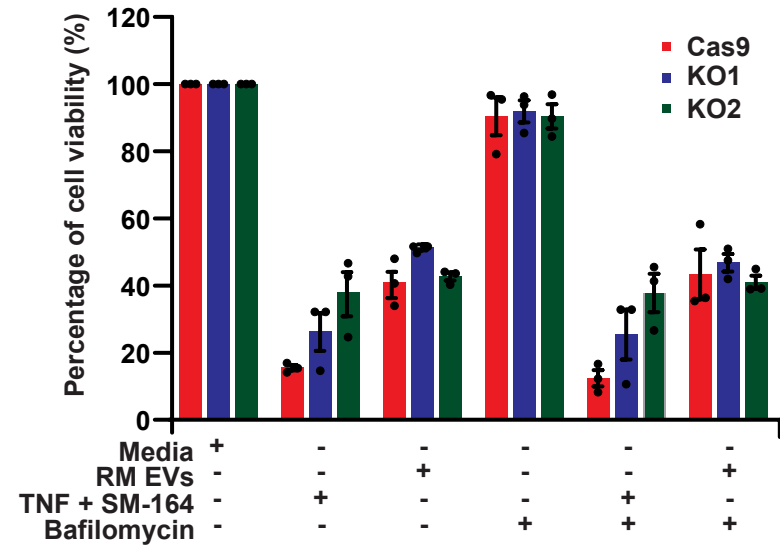

## Supplementary Figure 14

### Milk-derived EVs does not induce autophagy induced cell death

**a**, Western blot confirming CRISPR/Cas9 knockout of the autophagy regulator ATG5.

**b**, Cell viability of cancer cells did not increase on treatment of ATG5<sup>-/-</sup> cells with milk-derived EVs (100 µg/mL) or Cas9 cells with the autophagy inhibitor Bafilomycin A (100 nM) (*n*=3). All data are represented as mean ± s.e.m. Statistical significance was determined by two-tailed t-test.

# Supplementary Figure 15

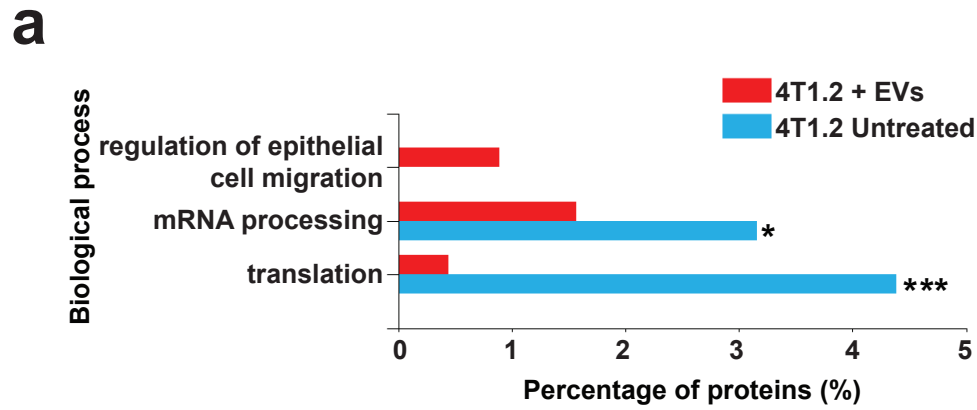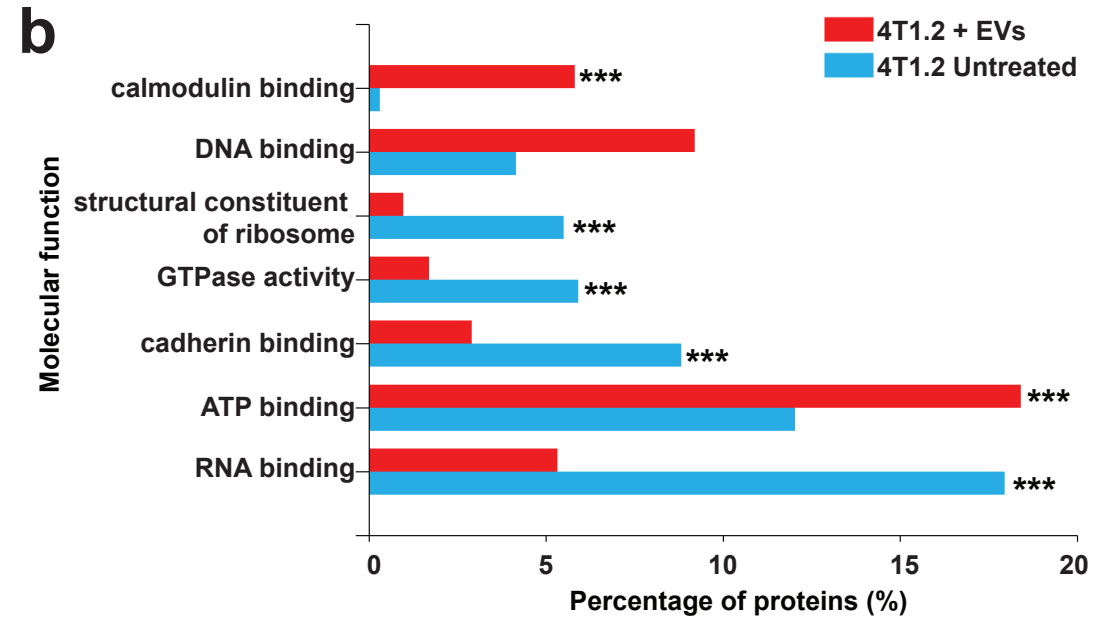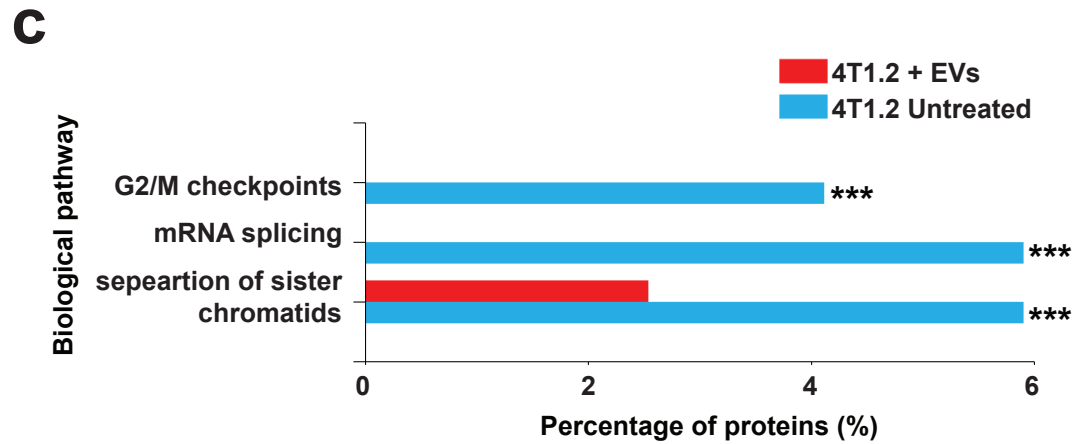

## Supplementary Figure 15

### Enrichment analysis of proteins dysregulated in cancer cells upon treatment with milk-derived EVs

**a**, In biological process, proteins implicated in translation and mRNA processing were depleted when 4T1.2 breast cancer cells were treated with milk-derived EVs. On the contrary, proteins implicated in epithelial cell migration were enriched in 4T1.2 cells treated with milk-derived EVs (\* $P < 0.05$ ; \*\*\* $P < 0.001$  as determined by hypergeometric test). **b**, In molecular function, proteins implicated in RNA binding, cadherin binding, GTPase activity and structural constituent of ribosome were depleted in cells treated with milk-derived EVs. Proteins implicated in ATP and calmodulin binding were enriched in cells treated with milk-derived EVs (\*\*\* $P < 0.001$  as determined by hypergeometric test). **c**, In biological pathway, proteins implicated in mRNA splicing, G2/M checkpoints and separation of sister chromatids were depleted in cells treated with milk-derived EVs (\*\*\* $P < 0.001$  as determined by hypergeometric test).

# Supplementary Figure 16

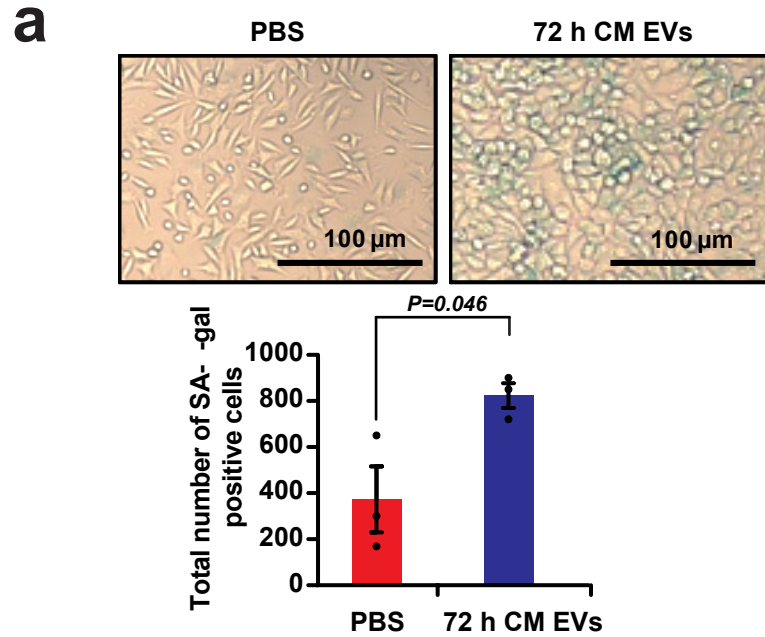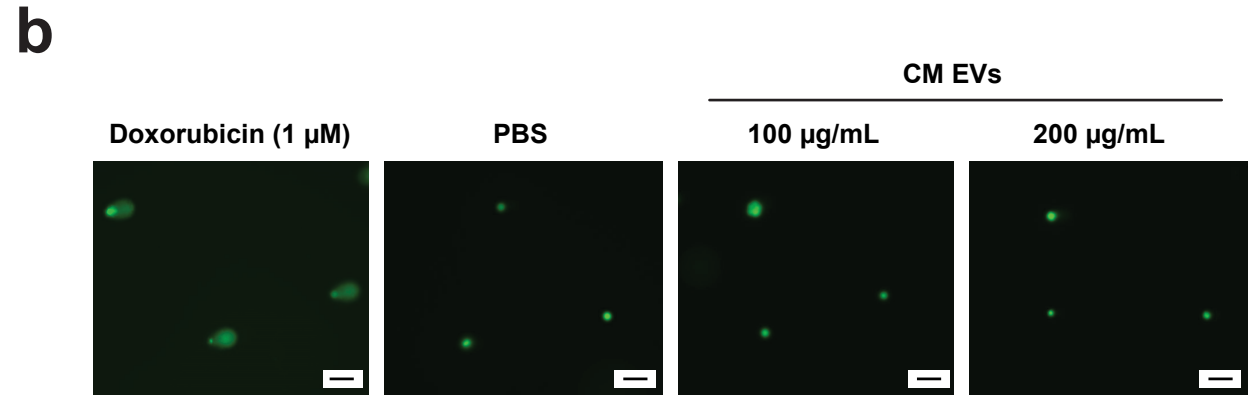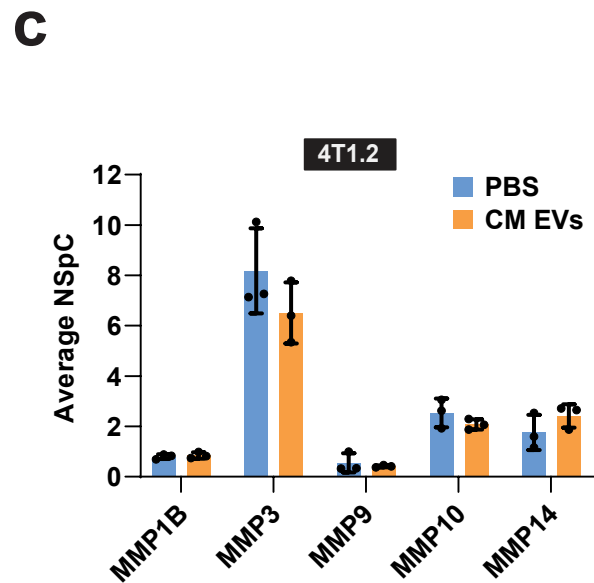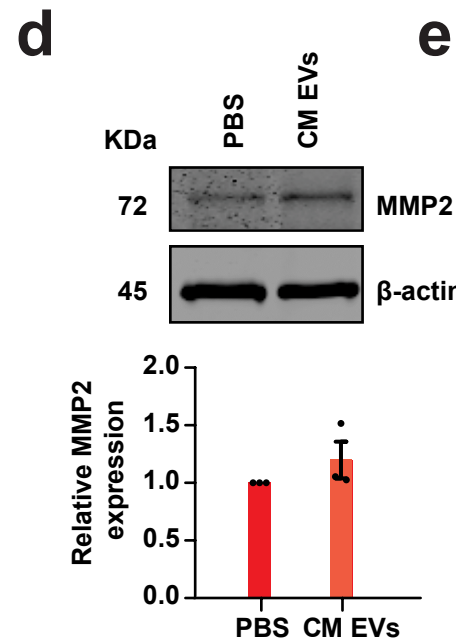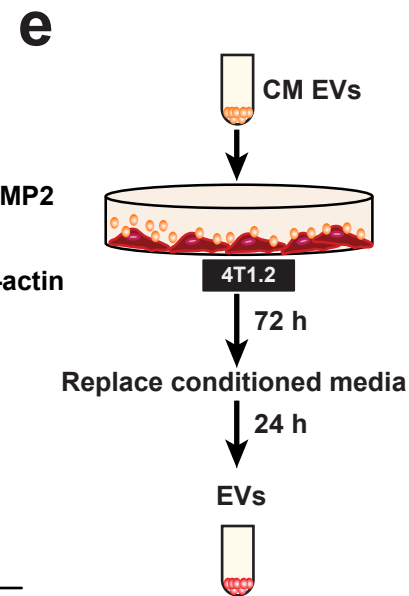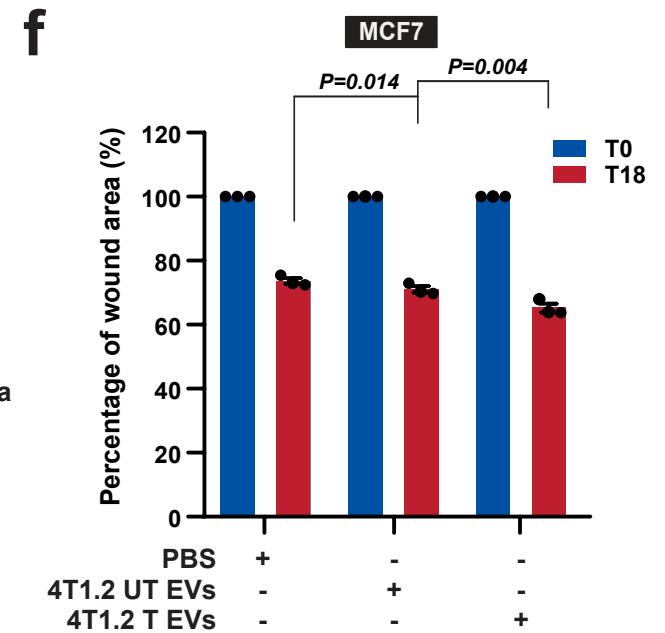

## Supplementary Figure 16

### Milk-derived EVs induce cellular senescence in cancer cells

**a**, Total number of senescence-associated  $\beta$ -galactosidase positive cells after treatment with or without milk-derived EVs (100  $\mu\text{g}/\text{mL}$ ) after 72 h is displayed. **b**, Comet assay depicting DNA damage in 4T1.2 cells in the presence of doxorubicin, PBS and CM EVs. Scale bar represents 100  $\mu\text{M}$ . **c**, Schematic representation of secretome and EVs collection from senescent cells. **d**, Western blotting for MMP2 in secretome of 4T1.2 cells treated with and without CM EVs (100  $\mu\text{g}/\text{mL}$ ). **e**, Wound healing assay depicts EVs (30  $\mu\text{g}/\text{mL}$ ) from CM EVs treated cells closed the wound faster. All data are represented as mean  $\pm$  s.e.m.  $n=3$ ; Statistical significance was determined by two-tailed t-test.



# Supplementary Figure 17

**a**

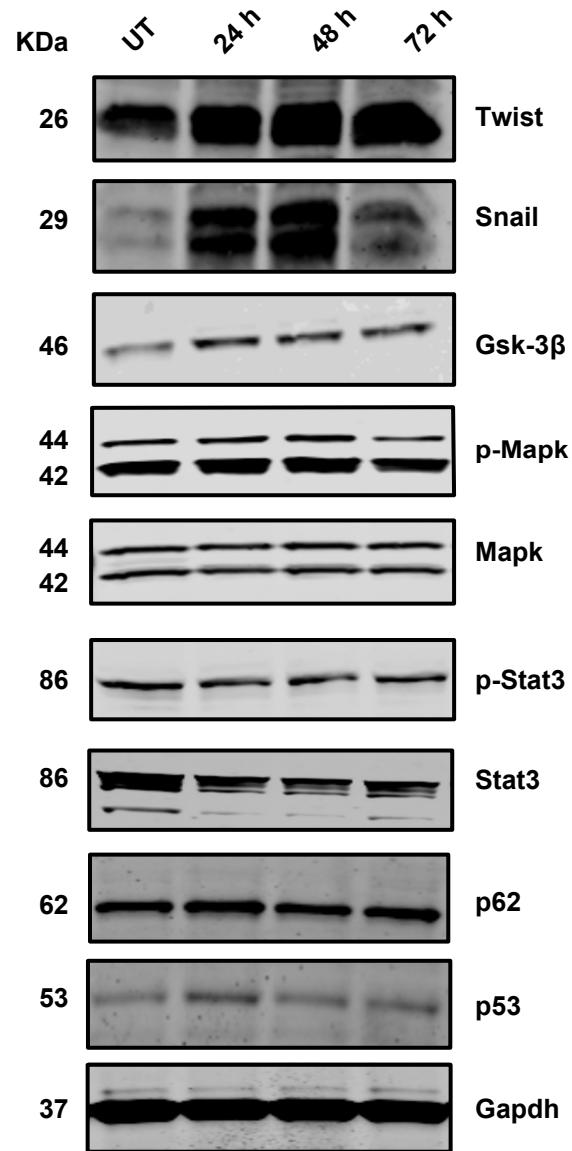

**b**

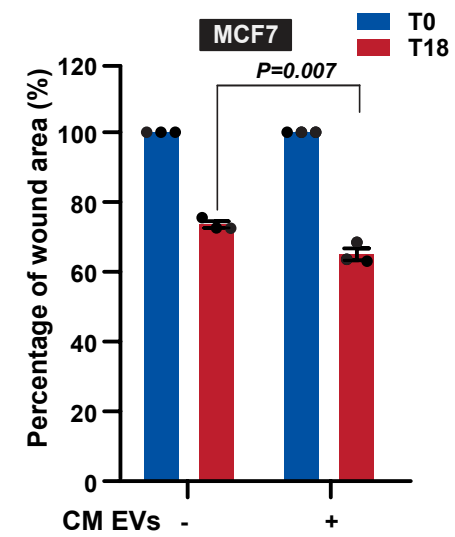

## **Supplementary Figure 17**

### **Milk-derived EVs induce EMT in cancer cells**

**a**, Western blot analysis of 4T1.2 cancer cells treated with or without milk-derived EVs (100  $\mu\text{g}/\text{mL}$ ). Molecules implicated in EMT and signalling were probed by Western blotting. **b**, Wound healing assay depicts CM EVs (30  $\mu\text{g}/\text{mL}$ ) induce significant migration in less invasive MCF7 cells ( $n=3$ ). All data are represented as mean  $\pm$  s.e.m. Statistical significance was determined by paired two-tailed t-test.

# Supplementary Figure 18

a

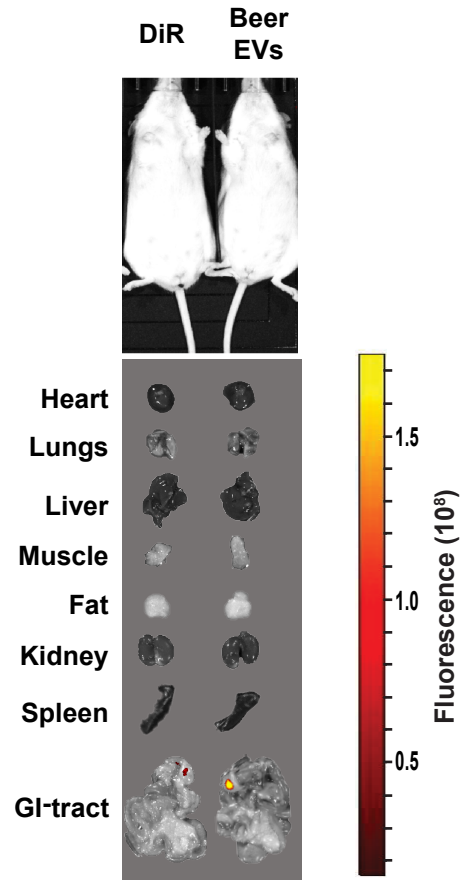

b

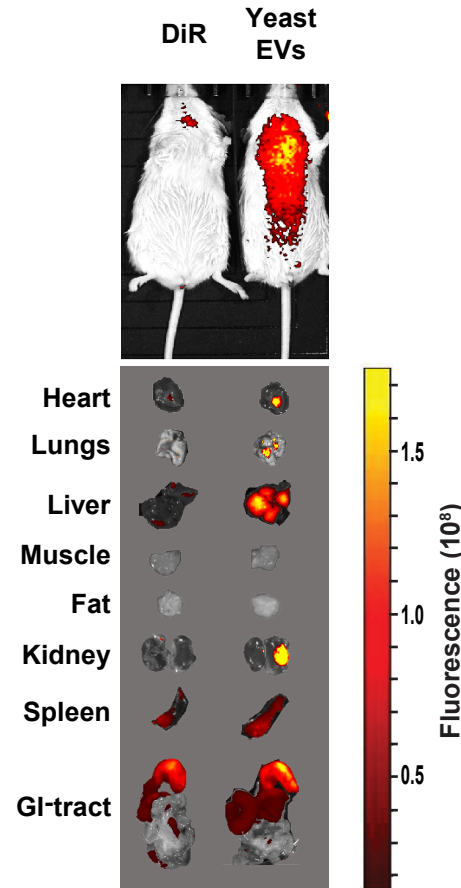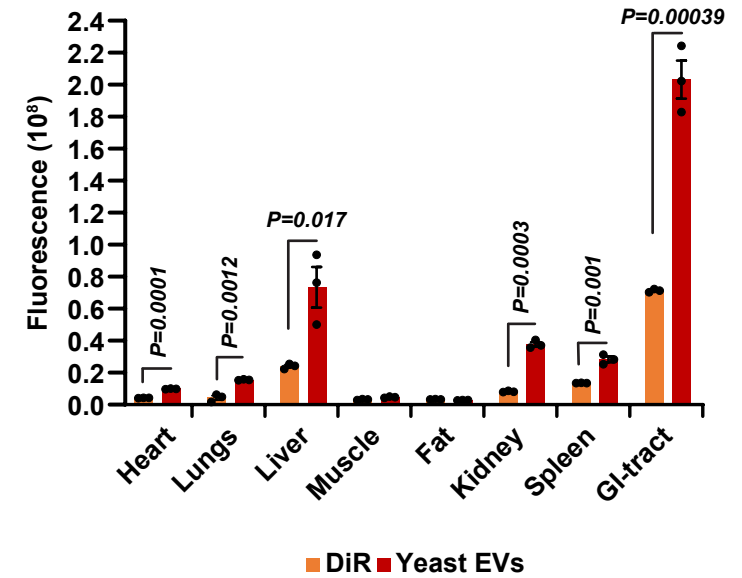

## **Supplementary Figure 18**

### **Biodistribution of beer and yeast EVs**

**a**, Biodistribution of physiologically relevant concentrations of orally gavaged beer EVs ( $n=4$ ). **b**, Biodistribution of orally gavaged yeast EVs (25 mg/Kg) in mice ( $n=4$ ). All data are represented as mean  $\pm$  s.e.m. Statistical significance was determined by unpaired two-tailed t-test.

# FULL BLOTS

**a**

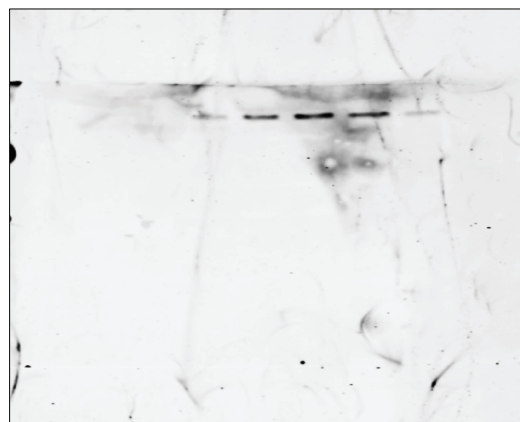

TSG101

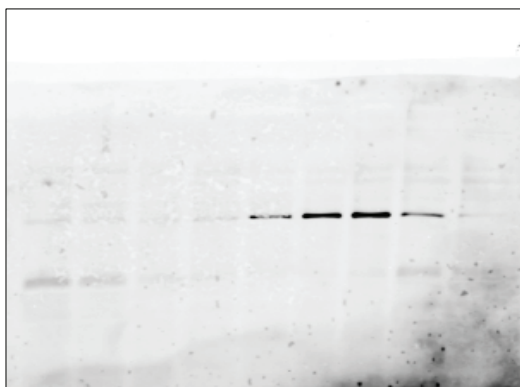

TSG101

**d**

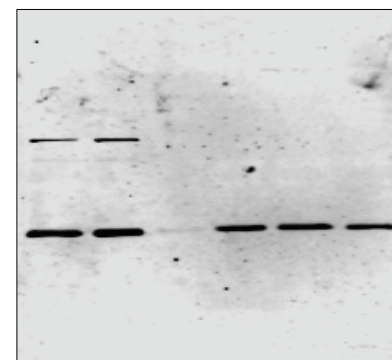

TSG101

**f**

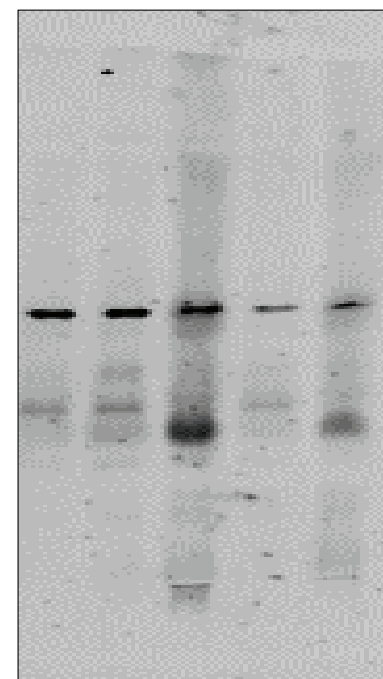

TSG101

**Figure 6**

**d**

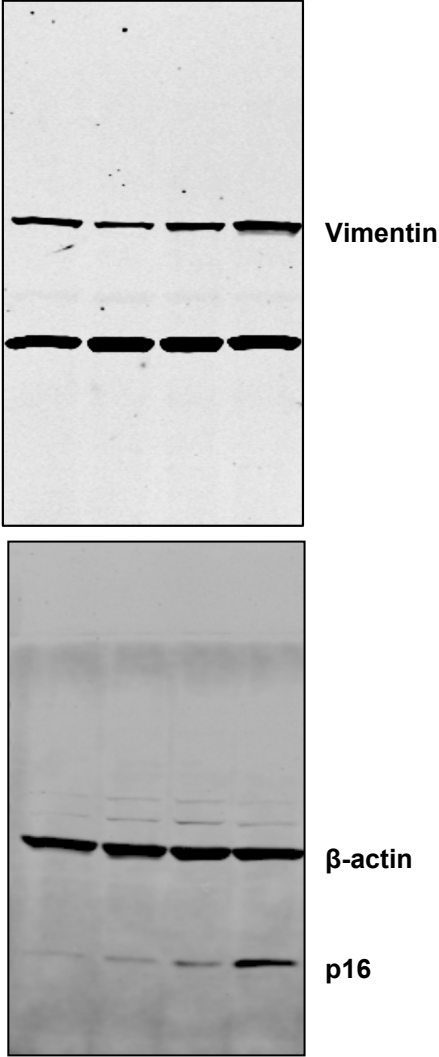

**f**

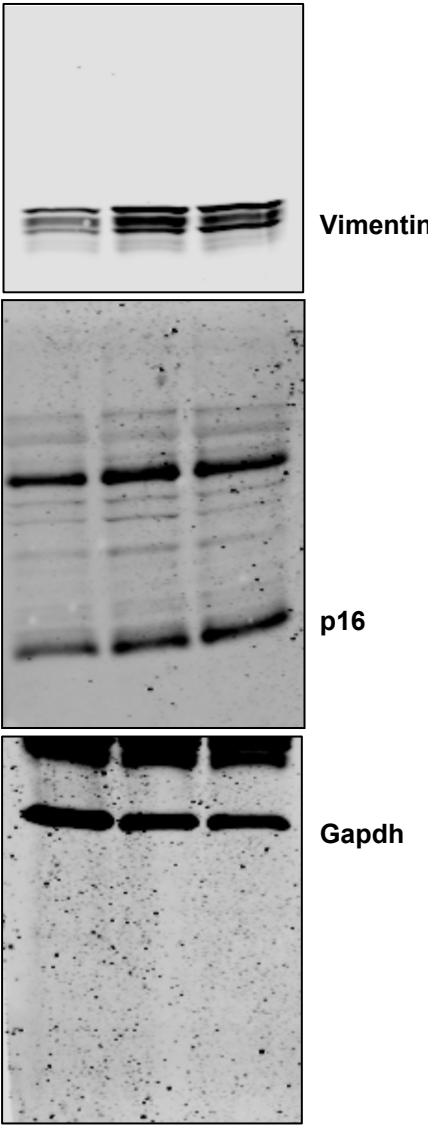

# Supplementary Figure 1

**a**

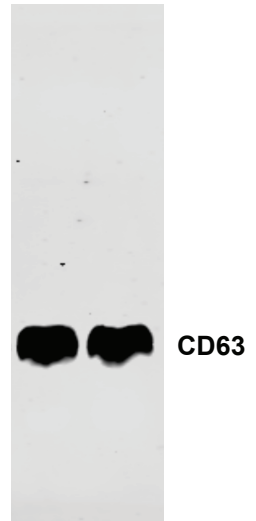

**b**

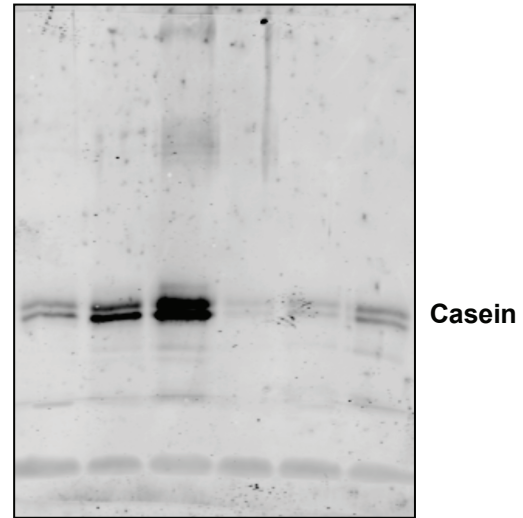

**i**

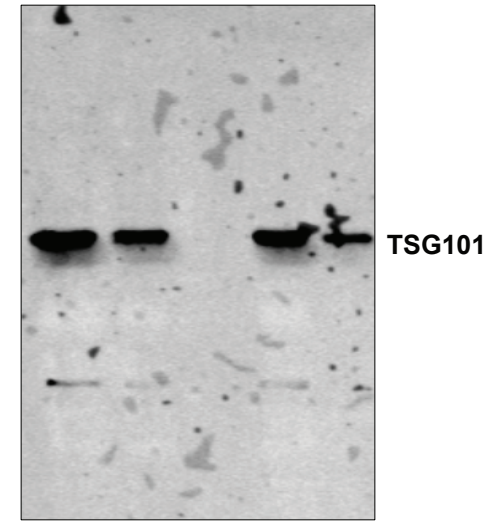

**d**

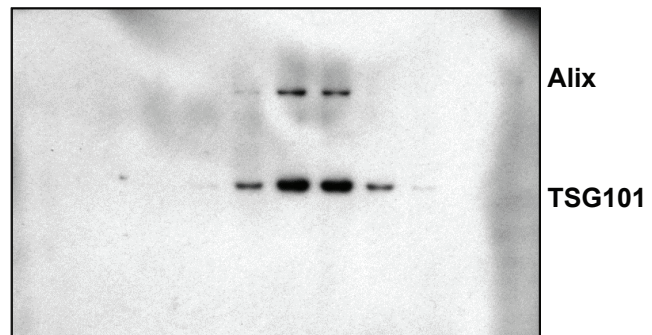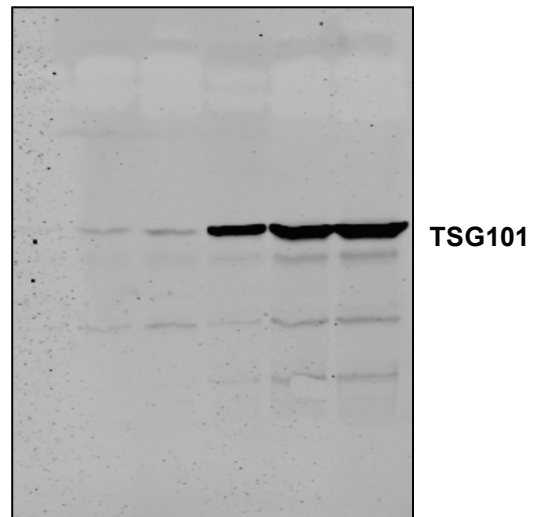

# Supplementary Figure 5

**b**

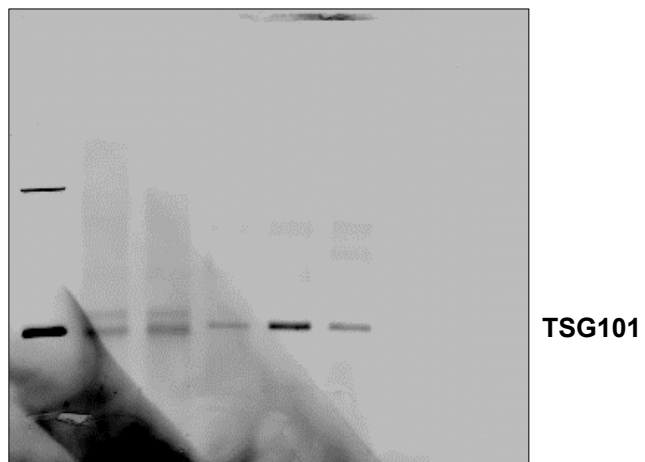



# Supplementary Figure 6

**a**

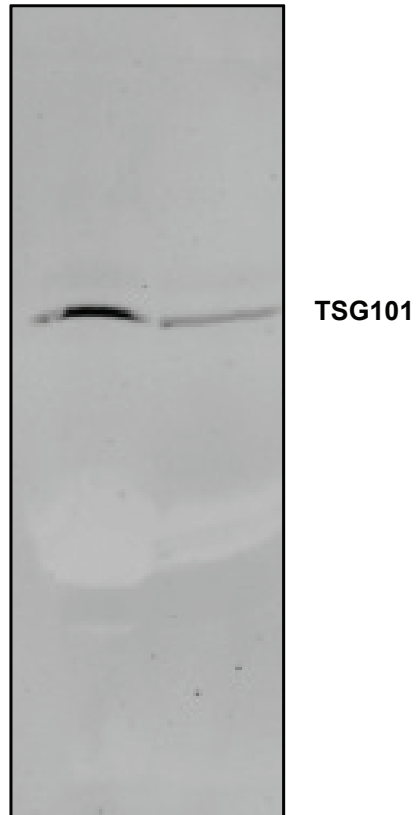

# Supplementary Figure 14

**a**

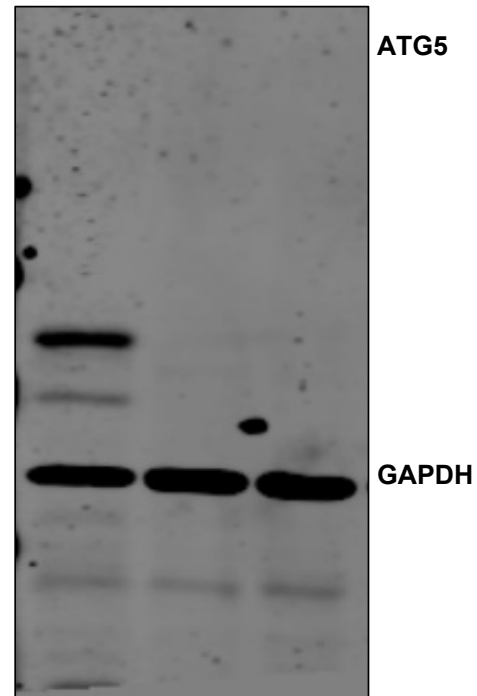

# Supplementary Figure 16

**d**

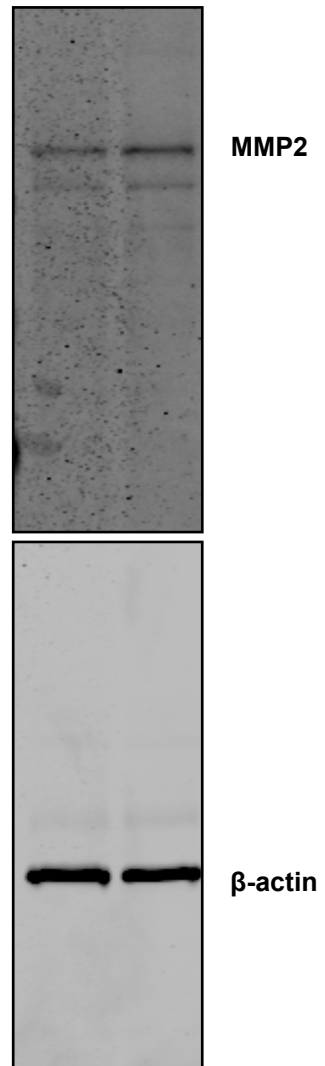

# Supplementary Figure 17

**a**

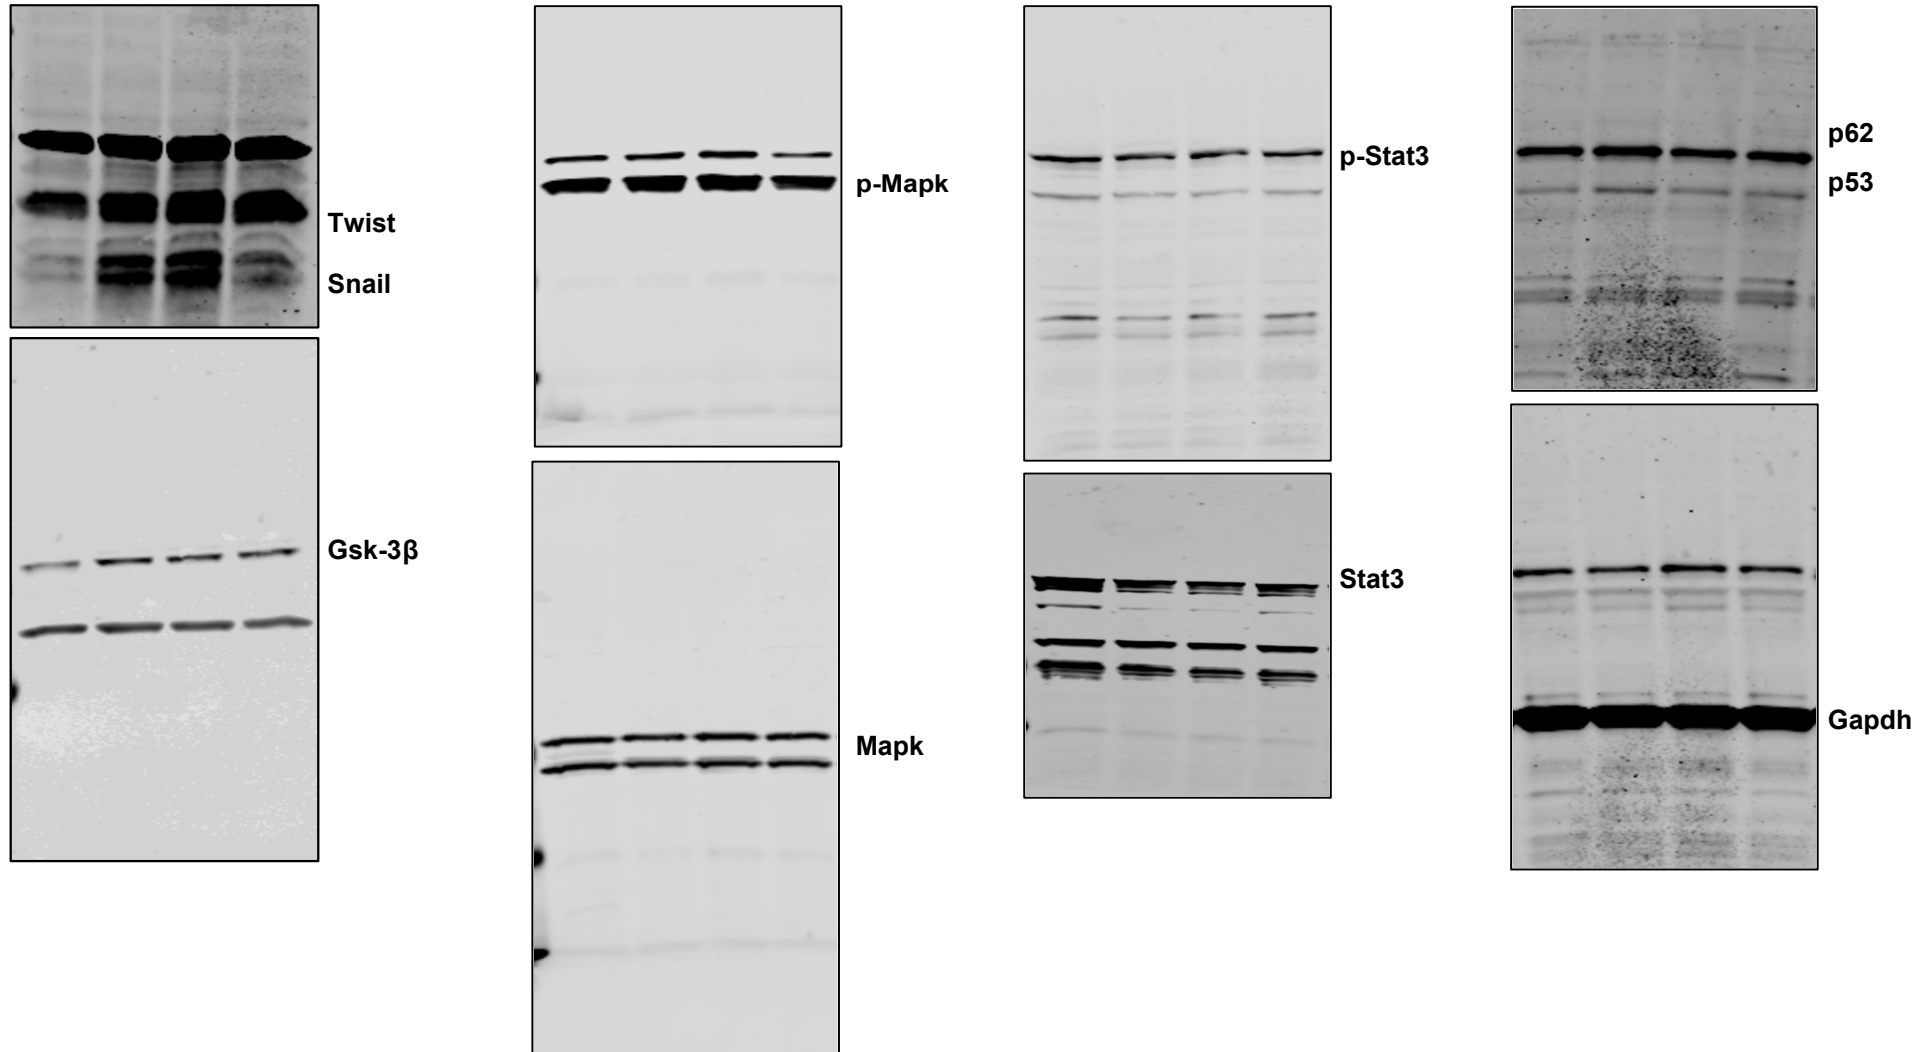

Supplement: 41467_2021_24273_MOESM1_ESM.pdf [file 41467_2021_24273_MOESM1_ESM.pdf]
